# Supplementary material for: Knowledge mobilisation: an ethnographic study of the influence of practitioner mindlines on atopic eczema self-management in primary care in the UK
Source: PubMed Central journal article supplement (PMC6661925; doi:10.1136/bmjopen-2018-025220), 2019-07-26
Supplement: bmjopen-2018-025220.draft_revisions.pdf [file bmjopen-2018-025220.draft_revisions.pdf]

# BMJ Open

BMJ Open is committed to open peer review. As part of this commitment we make the peer review history of every article we publish publicly available.

When an article is published we post the peer reviewers' comments and the authors' responses online. We also post the versions of the paper that were used during peer review. These are the versions that the peer review comments apply to.

The versions of the paper that follow are the versions that were submitted during the peer review process. They are not the versions of record or the final published versions. They should not be cited or distributed as the published version of this manuscript.

BMJ Open is an open access journal and the full, final, typeset and author-corrected version of record of the manuscript is available on our site with no access controls, subscription charges or pay-per-view fees (<http://bmjopen.bmj.com>).

If you have any questions on BMJ Open's open peer review process please email [info.bmjopen@bmj.com](mailto:info.bmjopen@bmj.com)

# BMJ Open

## Knowledge mobilisation: An ethnographic study of the influence of practitioner mindlines on eczema self-management in primary care in the United Kingdom

|                               |                                                                                                     |
|-------------------------------|-----------------------------------------------------------------------------------------------------|
| Journal:                      | <i>BMJ Open</i>                                                                                     |
| Manuscript ID                 | bmjopen-2018-025220                                                                                 |
| Article Type:                 | Research                                                                                            |
| Date Submitted by the Author: | 04-Jul-2018                                                                                         |
| Complete List of Authors:     | Cowdell, Fiona; Birmingham City University, Faculty of Health Education and Life Sciences           |
| Keywords:                     | Eczema < DERMATOLOGY, Ethnography, Knowledge mobilisation, Mindlines, PRIMARY CARE, Self-management |
|                               |                                                                                                     |

SCHOLARONE™  
Manuscripts

Peer review only

BMJ Open KM Practitioner mindlines 4.7.18 for submission

1  
2  
3  
4 **Article title:** Knowledge mobilisation: An ethnographic study of the influence of practitioner mindlines on  
5 eczema self-management in primary care in the United Kingdom

6 **Author information:**

7 Fiona Cowdell  
8 DProf, RN  
9 Professor of Nursing and Health Research  
10 Faculty of Health, Education and Life Sciences  
11 Birmingham City University  
12 220 Ravensbury House  
13 Westbourne Road  
14 Edgbaston  
15 Birmingham  
16 B15 3TN  
17 UK  
18 Telephone: +44 (0)121 300 4345  
19 Email: [Fiona.cowdell@bcu.ac.uk](mailto:Fiona.cowdell@bcu.ac.uk)  
20 [orcid.org/0000-0002-9355-8059](https://orcid.org/0000-0002-9355-8059)  
21

22  
23 **Word count:** 4802

24 **Number of figures and tables:** one figure and two tables

25  
26 **Keywords:** eczema, ethnography, knowledge mobilisation, mindlines, primary care, self-management  
27

28  
29 **Disclaimer and source of support:**

30 This report is independent research arising from a Knowledge Mobilisation Research Fellowship, Professor  
31 Fiona Cowdell, KMRF-2015-04-004 supported by the National Institute for Health Research. The views  
32 expressed in this publication are those of the authors and not necessarily those of the NHS, the National  
33 Institute for Health Research, Health Education England or the Department of Health.  
34  
35  
36  
37  
38  
39  
40  
41  
42  
43  
44  
45  
46  
47  
48  
49  
50  
51  
52  
53  
54  
55  
56  
57  
58  
59  
60

BMJ Open KM Practitioner mindlines 4.7.18 for submission

## **Knowledge mobilisation: an ethnographic study of the influence of practitioner mindlines on eczema self-management in primary care in the United Kingdom**

### **Abstract**

**Objective:** To explore how eczema specific mindlines are developed by primary care practitioners.

**Design:** Ethnographic study.

**Setting:** One large, urban general practice in central England.

**Participants:** In observation, all practitioners and support staff in the practice and in interviews a diverse group of practitioners (n=16).

**Results:** Observation of over 250 hours and interview data were combined and analysed using an ethnographic approach through the lenses of mindlines and self-management. Three themes were identified: beliefs about eczema, eczema knowledge and approaches to self-management. Eczema mindlines are set against a backdrop of it being a low priority and not managed as a long-term condition. Practitioners believed that eczema is a simple to manage with little change in treatments available and prescribing limited by local formularies. Practice is largely based on tacit knowledge and experience. Self-management is expected but not often explicitly facilitated. Clinical decisions are made from knowledge accumulated over time. Societal and technological developments have altered the way in which practitioner mindlines are developed; in eczema, for most, they are relatively static.

**Conclusions:** The outstanding challenge is to find novel, profession and context-specific, simple, pragmatic strategies to revise or modify practitioner mindlines by adding reliable and useful knowledge and by erasing outdated or inaccurate information thus potentially improve quality of eczema care.

### **Strengths and limitations**

- First ethnographic study to examine the development of eczema specific mindlines
- Diverse sample primary care practitioners
- Ethnographer was a lone researcher
- Results may be context specific

BMJ Open KM Practitioner mindlines 4.7.18 for submission

## Introduction

Eczema is a common, long-term skin condition affecting around one in five children and one in twelve adults in the United Kingdom (UK). It can have a detrimental impact on wellbeing and quality of life and globally is one of the fifty most burdensome diseases (1). Eczema is mainly treated in primary care (2). People may seek advice from general practitioners (GPs), practice nurses (PNs), nurse practitioners (NPs), health visitors (HVs), community pharmacists (CP) and pharmacy counter staff (PCS).

GP consultations are often unsatisfactory for both patient (3) and practitioner (4, 5) with GPs dominating encounters and using avoidance tactics (6) and there being significant dissonance between patient / parent and GP beliefs about assessment and treatment (6). Many GPs have limited specialist dermatology knowledge (7). Nurse consultations, albeit in secondary care, tend to be more positively evaluated (8, 9) and minimal research has been conducted into the contribution of HVs. Research into the role of the CP in dermatology care is limited (10) and expertise may be suboptimal (11) despite CPs reporting being at least reasonably confident in their role (12). The role of the pharmacy counter assistant is equally under-researched although they are often first point of contact for customers and may offer health advice independent of pharmacists (10, 13).

The mainstay of eczema treatment is the regular application of emollients, at least daily and often for many years, with or without intermittent topical steroids and calcineurin inhibitors. Non-adherence results from the high self-management demand of applying topical treatments (14) but also lack of information and conflicting advice from different health professionals (15). Despite available evidence (for example the National Institute for Health Research Guideline for Eczema (16) and the Global Resource for Eczema Trials database 17)), providing evidence-based treatment appears to be a challenge for health professionals managing eczema (18).

Self-management is a policy imperative which can improve disease outcomes and quality of life for people living with long-term conditions (19). Strategies to support eczema self-management are poorly understood,

BMJ Open KM Practitioner mindlines 4.7.18 for submission

1 have limited availability, can be costly and have variable impact (20). Eczema is not classified as a long-term  
2 condition in the same way as other illnesses for example asthma (21).  
3  
4  
5  
6  
7

8 Primary care practitioners are expected to deliver evidence-based practice (EBP). Evidence based medicine  
9 (EBM) was originally the preserve of doctors and was defined as “the conscientious, explicit, and judicious  
10 use of current best evidence in making decisions about the care of individual patients” (22). Over time,  
11 other professions have embraced EBP but this has, at times, been conceptualised as a set of research-based  
12 facts which if disseminated to practitioners will ensure more standardised, high quality care (23); this  
13 notion is now largely dismissed (24). Primary care practitioners face particular challenges in EBP given the  
14 volume of information they need and information overload is a real problem (25).  
15  
16  
17  
18  
19  
20  
21  
22  
23  
24

25 The study of knowledge mobilisation (KM) is growing exponentially in health care, at its simplest it is  
26 “moving knowledge to where it can be most useful” (26). KM involves determined efforts to create, share  
27 and use research and other forms of knowledge predicated on the understanding that to be effective KM  
28 activity must be relational, constructed from social interaction and context-specific (27-29).  
29  
30  
31  
32  
33  
34

35 Mindlines, developed from a primary care based ethnographic study (30) offer a “real world” approach to  
36 mobilising knowledge and changing clinical practice. Mindlines are “collectively reinforced, internalised  
37 tacit guidelines” which underpin clinical decision-making (30). They build on the work of Polyani (31) and  
38 Nonaka and Takeuchi (32) who propose that knowledge is not necessarily conscious and explicit, and that  
39 tacit knowledge in the form of unconscious schemata and technical know-how are dominant influencers of  
40 action compared with formal codified knowledge. Gabbay and LeMay (28) suggest that mindlines are based  
41 on flexible, embodied and intersubjective understanding of knowledge that is grounded in the acceptance  
42 that there are multiple realities and that knowledge is context-specific. Mindlines represent a complex  
43 amalgamation of knowledge gathered from many sources for example, communication with colleagues and  
44 opinion leaders in the field and from tacit knowledge developed over time (28). In their original work,  
45 Gabbay and LeMay (30) examined the construction of mindlines across primary care. A subsequent  
46  
47  
48  
49  
50  
51  
52  
53  
54  
55  
56  
57  
58  
59  
60

BMJ Open KM Practitioner mindlines 4.7.18 for submission

1 synthesis of 10 years of mindline literature (n=340) reports that they have been conceptualised and used in  
2  
3 four distinct ways. “Nominal” in which the term was used in name only, sometimes with a degree of  
4  
5 scepticism, “in practice” examining how mindlines are developed and spread in everyday practice,  
6  
7 “theoretical and philosophical” in which the aim was to extend existing theory and “solution focused”,  
8  
9 exploring ways in which mindlines can be influenced. Solution focused papers (n=28) emphasise the  
10  
11 importance of collaborative learning, relationship building and effective leadership in the development of  
12  
13 valid, collective, evidence-based mindlines. This review reveals a paucity of information about development  
14  
15 or strategies to amend condition specific mindlines (33). Repeating the search strategy utilised for this  
16  
17 review in 2018 revealed an abundance of further related literature but little directly addressing condition  
18  
19 specific mindlines or how they may best be amended.  
20  
21  
22  
23

24 Given the prevalence of eczema, the challenges of primary care consultations and the high self-  
25  
26 management demand, it is prudent to investigate the way in which eczema mindlines are constructed by  
27  
28 practitioners. This will inform understanding of mindlines “in practice” and will underpin future “solution  
29  
30 focused” work to develop novel, context-specific, simple and pragmatic strategies to revise or modify  
31  
32 eczema mindlines by adding reliable and useful knowledge and by erasing outdated or inaccurate  
33  
34 information thus potentially improve quality of eczema care and self-management.  
35  
36  
37  
38

## 39 **Method**

### 40 *Aim*

41 To understand construction of healthcare practitioner eczema mindlines in primary care.  
42  
43

### 44 *Design*

45 An ethnographic approach was employed. Ethnography is founded in anthropology and is concerned with  
46  
47 the systematic study of people and cultures (34). Data is collected through extensive observation with  
48  
49 informal conversations, field notes and interviews (35, 36). Data was collected in one large general practice  
50  
51 in England.  
52  
53  
54  
55  
56  
57  
58  
59  
60

BMJ Open KM Practitioner mindlines 4.7.18 for submission

*Setting, participants and process*

Data were collected by the author, a nurse and researcher, from January - June 2017. The General Practice was identified by a local clinical research network. It was a research and education active urban general practice in a demographically diverse and deprived area of England with a patient population of approximately 10,000. Observations were also conducted in a local pharmacy. No practitioners reported a special interest in dermatology. In preparation for data collection the researcher attended two practice meetings to outline conduct of the study. Data were collected in more than 250 hours of observation during all surgery opening hours. The role of social-participant-as-observer, that is, predominantly observer with some social functions such as cleaning couches was taken (37). Observation began with the reception team to understand the day-to-day working of the practice. Observation of consultations with GPs, GP trainees and locums, nurses, health visitors in baby clinics and pharmacy staff followed. GP telephone consultations were listened to and discussed with the practitioner. Field notes were documented and informal conversations either written contemporaneously or audio-recorded. Entire clinics were attended regardless of presenting complaint, to gain understanding in the context of other long-term conditions. Between consultations practitioners recounted recent eczema consultations. Single, semi-structured interviews using a topic guide (Table 1) were conducted with practitioners from each profession (n=16) (Table 2) using maximum variation purposive sampling (38) to ensure a mix of job role and level of experience. A predominance of female participants was reflective of the profile of the healthcare team.

Table 1: Practitioner interview topic guide

- Do you have any special interest in skin health?
- How much contact do you have with patients with eczema?
- What sort of treatments do you use most often?
- How do you decide on a particular treatment?
  - What impact does the local formulary have on your prescribing?
- How much are you able to advise patients on how to care for their eczema?
  - Concordance etc



## BMJ Open KM Practitioner mindlines 4.7.18 for submission

- How do you update your own knowledge about eczema?
- How could we best get research information to use in your practice?
  - What methods do you use now?
  - Can you give any specific examples?
- Do patients come with their own ideas about the treatment they need?
- How much do you and your patient share the decision about what treatment to use?
- How do you reconcile patient's needs with what is available?
- Do you refer patients to any external sources of information?

Table 2: Demographic details of interview participants

| Role                   | Years in practice |
|------------------------|-------------------|
| Health visitor         | 10                |
| GP                     | 35                |
| GP Trainee             | 2                 |
| Practice nurse         | 31                |
| Practice nurse         | 32                |
| Pharmacist             | 8                 |
| GP Trainee             | 5                 |
| Pharmacist             | 12                |
| Pharmacy counter staff | 10                |
| Pharmacy counter staff | 17                |
| GP Trainee             | 7                 |
| GP                     | 6                 |
| GP                     | 5                 |
| Health visitor         | 2                 |
| Health visitor         | 2                 |

BMJ Open KM Practitioner mindlines 4.7.18 for submission

|                |   |
|----------------|---|
| Health visitor | 3 |
|----------------|---|

Interviews were conducted in the workplace and lasted from 22-40 minutes. Data sufficiency was achieved when no new insights were forthcoming (39). For completeness documents and websites were reviewed including the NICE Clinical Guideline for Eczema (17), the local emollient formulary and the Clinical Knowledge Summary (40) and GP notebook pages (41) for eczema.

Data collection and analysis were iterative with initial findings being used to guide further collection (42). Audio-data were professionally transcribed and transcripts read against the recording by the researcher to confirm accuracy. Data analysis was completed independently by the researcher, though the lenses of mindlines and self-management. Transcripts and field notes were read in full to get a sense of the data as a whole, and then manually coded, categorised and merged into themes. Post theme development, relevant sections of the data were revisited to ensure authentic interpretation and use of participant language.

### *Reflexivity*

Reflexivity was maintained throughout the study with particular attention being paid to subjectivity and positioning as a nurse and skin health researcher; pre-understandings were consciously set aside (43).

### *Patient and Public Involvement*

Lay people were involved in the development of the research question and in planning the design of the study.

## **Results**

Data analysis resulted in three themes: beliefs about eczema; eczema knowledge and approaches to self-management. Each is discussed with examples from the data below.

### *Theme 1: Beliefs about eczema*

BMJ Open KM Practitioner mindlines 4.7.18 for submission

1  
2 Eczema was consistently viewed as a “*bread and butter*” [GP] condition that accounted for many  
3  
4 consultations. However, although 19.5% of the practice population was recorded as having some type of  
5  
6 eczema few consultations primarily for this condition were observed. Analysis of patient reported reason  
7  
8 for GP consultation for a typical week during observation revealed that 26/627 (4.1%) of reasons were skin  
9  
10 related with none citing eczema as the primary complaint. No observed face-to-face consultations were  
11  
12 primarily for eczema; it was reported as a secondary concern in a small number of number of GP  
13  
14 consultations and more often to HVs in baby clinics. This resulted in eczema necessarily being given limited  
15  
16 attention “*it’s often a secondary problem and there’s only time to deal with one problem per consultation*”  
17  
18 [GP]. Telephone consultations with GPs were witnessed and patients were observed to consult with  
19  
20 pharmacy staff about their eczema. Practitioners mainly viewed eczema as a nuisance condition requiring  
21  
22 limited knowledge to treat effectively, “*eczema is simple to treat, nothing much has changed over the years*”  
23  
24 [GP] and “*the recipe doesn’t change* [GP]”.

25  
26  
27  
28  
29 Some GPs described eczema as a “*catch up*” [GP] consultation when clinics were over-running. GPs and  
30  
31 nurses noted the absence of specific external incentives for long-term eczema management and that it was  
32  
33 a condition without the “*red flags*” [GP] which trigger treatment escalation or referral. They described  
34  
35 treatment options as straightforward involving emollients with or without intermittent topical steroids.  
36  
37 Few mentioned calcineurin inhibitors or other available medications. Most practitioners considered  
38  
39 emollients to be a homogenous group of preparations all with similar properties, although a few  
40  
41 differentiated in terms of viscosity and texture. Pharmacy staff and HVs were familiar with a broader range  
42  
43 of emollient products and were more likely to offer suggestions for over the counter preparations. This was  
44  
45 in part because no HVs in this study were able to prescribe. GPs were reluctant to prescribe topical steroids  
46  
47 or other treatments unless absolutely necessary. PNs rarely saw patients with eczema other than older  
48  
49 people with varicose eczema who were attending for leg ulcer treatment.  
50

51  
52  
53  
54 Practitioners recognised that eczema could have a negative impact on wellbeing and quality of life but this  
55  
56 was not often reflected in the care offered. Treatment was mainly in reaction to a flare rather than there  
57

BMJ Open KM Practitioner mindlines 4.7.18 for submission

1  
2 being a long-term plan of care. Generally patients were able to access regular repeat prescriptions for  
3  
4 emollients and practitioners expressed a level of frustration when they presented with a flare having not  
5  
6 requested or used the prescribed treatments. Although 'safety netting' was always in place, planned  
7  
8 follow-up consultations were not suggested. Empathy for patients was most evident in practitioners who  
9  
10 had personal experience of eczema, they articulated a varying level of understanding about the differences  
11  
12 between products, regardless of available empirical evidence, and the extent to which personal preference  
13  
14 influenced concordance. Pharmacy counter staff were the most conversant with the differences between  
15  
16 emollient products having tried samples, and they were most likely to share this knowledge with patients /  
17  
18 customers verbally and in leaflets.  
19  
20  
21

22  
23 Although eczema was viewed as a frequent reason for consultation, it was mainly presented as a secondary  
24  
25 concern and so dealt with swiftly. Eczema was considered simple to treat with little change over time  
26  
27 although practitioners with personal experience of eczema were more aware of the challenges of self-  
28  
29 management and tolerant of personal treatment preferences.  
30  
31  
32

### 33 *Theme 2: Eczema knowledge*

34  
35 Beliefs about eczema influenced the formation of mindlines and for most mindlines were set against a  
36  
37 backdrop of eczema being a low priority condition and a perception of unchanging treatment options which  
38  
39 were constrained by local prescribing guidelines (Figure 1). Many practitioners described eczema as a  
40  
41 common conditions for which you "know [treatment] by heart [GP]" and likened his response to using a  
42  
43 "satnav .....you stop thinking, the little NHS boxes [on the computer] tell you what to prescribe [GP]".  
44  
45  
46  
47

48 Most practitioners reported that their eczema knowledge was based on their initial education and  
49  
50 recognised "pre-reg dermat education was very, very basic" [GP]. A few had completed dermatology  
51  
52 placements during GP training but reported seeing little eczema. One experienced GP recounted learning  
53  
54 from a consultant, her practice was unchanged as she had "learnt from a consultant many years ago and  
55  
56 never heard anything to contradict it" [GP]. PNs and GPs were aware of available dermatology education  
57  
58  
59  
60

BMJ Open KM Practitioner mindlines 4.7.18 for submission

1 but did not attend as it was a low priority and costly, *“there is training but you have to pay”* [PN] and they  
2  
3 preferred to *“avoid reps and sponsored sessions”* [GP]. HVs reported that skin health was never an  
4  
5 educational priority. Pharmacist’s knowledge was updated through e-bulletins from different sources and  
6  
7 covered only changes in, and availability of, medications. Only PCS received eczema specific education by  
8  
9 attending regular seasonal sessions provided by their employer. Although deemed to be useful, particularly  
10  
11 as they tried products and were advised on correct application, the educational experience was sometimes  
12  
13 suboptimal as one reported how she was *“shamed into remembering”* [PCS] session content.  
14  
15

16  
17  
18 Local emollient guidelines underpinned many prescribing decisions so practitioners did not need to think as  
19  
20 *“software will fire up a message if another product should be used”* [CP]. Changes to guidelines were  
21  
22 ascribed to cost and *“what was in vogue”* [GP]. Practitioners were not concerned about these changes  
23  
24 stating for example, *“aqueous cream, they’ve gone off that idea for some reason”* [PCS] and *“Zero products*  
25  
26 *are the ones that are currently on trend”* [GP trainee]. Whilst some prescribers stuck rigidly to prescribing  
27  
28 the cheapest product, *“I try to be good and prescribe the cheaper side of things”* [GP trainee], others were  
29  
30 more flexible according to their own or the patient’s preference. However, deviations from the formulary  
31  
32 were rare on the basis that *“local formulary is very constraining and you’d have to be able to justify why*  
33  
34 *you’d prescribed anything else”* [GP]. Exceptions were observed in the baby clinic and in pharmacy practice  
35  
36 where patients were often informed about a wider range of emollients that could be purchased over the  
37  
38 counter. For those who paid a prescription charge this could often be more cost effective. PCS suggested  
39  
40 that they were able to advise patients readily as they had *“tried samples so you can tell the customers what*  
41  
42 *they feel like”* [PCS].  
43  
44

45  
46  
47  
48 Other knowledge sources contributed to eczema mindlines. All staff, with the exception of experienced GPs,  
49  
50 used internet searches most commonly the online resources GP Notebook and Clinical Knowledge  
51  
52 Summaries. Useful websites were often book-marked and visited in preparation for a consultation rather  
53  
54 than alongside the patient. If information was not located almost immediately the practitioner switched to  
55  
56 another website *“we’re hard wired for speed now”* [GP] and *“dipped into what’s relevant”* [GP] as and when  
57  
58

BMJ Open KM Practitioner mindlines 4.7.18 for submission

1 required. None mentioned existing NICE Eczema Guidelines. Local emollient guidelines existed and  
2  
3 influenced the prescribing practice of most practitioners, however others were unaware of these and some  
4  
5 found them hard to access. GPs and HVs used different emollient guidelines and this caused confusion for  
6  
7 patients when they consulted both. A member of pharmacy staff noted the need for *“a synchronised*  
8  
9 *approach so patients don’t get confused”* [PCS]. Practitioners also experienced confusion when offering  
10  
11 advice on treatment application, for example *“treatment is a bit arbitrary – for example should you advise*  
12  
13 *steroid or emollient first?”* [HV].

14  
15  
16 Practitioners learnt from each other to a limited extent, most often within their professional groups. They  
17  
18 recognised *“we learn both good and bad habits from each other”* [PN]. Opportunities for shared learning  
19  
20 had reduced as there was little time to meet up and in-house teaching for GPs and PNs had *“fallen by the*  
21  
22 *wayside”* [GP] due to staff sickness and pressure of work. One GP reported *“phoning a friend”*, now a  
23  
24 consultant dermatologist, when she needed advice. GPs reported learning from trainees during debrief  
25  
26 sessions but could not recall ever having discussed eczema. Trainees exhausted all available information  
27  
28 sources before seeking advice from a GP. HVs and PNs met more frequently and exchanged knowledge  
29  
30 more regularly, although eczema was not a condition of interest.

31  
32  
33  
34  
35 Practitioners expressed varied views on the value of patient knowledge and experience and the extent to  
36  
37 which it influenced care. PNs, HVs and pharmacy staff respectively reported that they routinely *“ask patient*  
38  
39 *what they have tried already”* [PN], *“see what’s worked for them”* [HV] and *“listen and learn from*  
40  
41 *customers”* [PCS] and used this information as a basis for treatment advice. Others listened to patients with  
42  
43 a degree of scepticism but acquiesced to patient preference, *“patients often have fixed ideas [about*  
44  
45 *emollients] and I try to accommodate these”* [GP]. A few were less receptive, for example *“I try to use*  
46  
47 *guidelines and the formulary ..... patient experience stuff can be counterproductive”* [GP trainee] and  
48  
49 others suggested that their wider experience overrode the patients personal preferences and experiences  
50  
51 *“experience wise I’ve found a lot of people get on with it [particular emollient]”* [GP] and therefore that was  
52  
53 what would be prescribed.  
54  
55  
56  
57  
58  
59  
60

BMJ Open KM Practitioner mindlines 4.7.18 for submission

1 Only the most experienced practitioners spontaneously articulated the existence of tacit knowledge stating,  
2  
3 *“it’s a perpetual exercise ... adding on knowledge and skills”* [GP] and *“built up knowledge over time”* [PN].  
4  
5 Others pointed to more concrete sources of knowledge. All practitioners understood reliability of evidence  
6  
7 to a greater or lesser extent.  
8  
9

10  
11  
12 Eczema knowledge was constructed from different sources by individual professions. Nursing and medical  
13  
14 staff perceived a limited need to update their knowledge as eczema care was viewed as having changed  
15  
16 little over time. Exceptions to this were practitioners who had personal experience of eczema and  
17  
18 pharmacy staff who regularly updated their mindlines using informal and formal sources of knowledge.  
19

### 20 *Theme 3: Approaches to self-management*

21  
22 In principle, all practitioners supported self-management of eczema but recognised the difficulties of  
23  
24 achieving this in practice particularly without formal recognition as a long-term condition (LTC). Some  
25  
26 practitioners routinely used techniques to support self-management for patients with other LTCs.  
27  
28 Strategies included for example by *“finding out patients’ expectations”* [PN], *“tailoring knowledge to the*  
29  
30 *person”* [GP], *“start with what the patient understands and then fill in the gaps”* [GP], *“give patients a map*  
31  
32 *of management”* [GP], *“instil confidence”* [GP] and *“reinforce that self-management is good”* [GP trainee]. A  
33  
34 few GPs used specific techniques such as *“short bursts of CBT”* [GP], *“motivational interviewing*  
35  
36 *techniques ..... compressed to fit in consultation”* [GP] and *“behaviour modification ..... not a one*  
37  
38 *consultation job”* [GP]. Even practitioners who did not articulate using strategies to support self-  
39  
40 management integrated them in practice for many LTCs. However they were rarely observed or discussed  
41  
42 in relation to eczema.  
43  
44  
45  
46  
47

48 Most eczema care was reactive when patients presented with a flare and talk of eczema care was almost  
49  
50 exclusively about treatment options with virtually no attention paid to ensuring that the patient  
51  
52 understood the condition and actions they could take to avoid the relentless cycle of flares. The most  
53  
54 tangible contribution to self-management was the availability of repeat prescriptions for emollients but  
55  
56 advice to use these consistently was lacking. Barriers to self-management were observed, for example the  
57  
58  
59

BMJ Open KM Practitioner mindlines 4.7.18 for submission

1  
2 appointment system often precluded patients seeing the same GP over time so treatment could be altered  
3  
4 without the benefit of fully understanding the patient journey to date. Contradictory advice given by  
5  
6 practitioners and a lack of faith in patient's ability to judge when they needed to use topical steroids and to  
7  
8 use them safely presented significant barriers to successful self-management. Practitioners suggested the  
9  
10 *"need to see patients before prescribing [topical] steroids"* [GP], one GP stated that *"sensible"* patients may  
11  
12 get steroids on repeat but struggled to quantify sensible in this context. Pharmacy staff did not recognise  
13  
14 their contribution to self-management per se but recognised the positive impact they had on eczema  
15  
16 management through *"actually taking notice of what they're telling me"* [PCS] and perceived *"they do trust*  
17  
18 *me ..... I'm well known in the local community"* [PCS] and were therefore easy for customers to  
19  
20 speak with.  
21  
22  
23  
24

25 Whilst recognising the need for self-management the fact that eczema is not categorised as a long-term  
26  
27 condition limited how much patients were supported to self-manage and at times healthcare systems could  
28  
29 hinder attempts.  
30  
31  
32

### 33 Discussion

34  
35 This study offers new insights into how primary care practitioners construct eczema specific mindlines.  
36  
37 Practitioner mindlines are predominantly set against a back drop of eczema being a low priority, due to a  
38  
39 combination of not being viewed as an LTC and so lacking external incentives and the perception of  
40  
41 available treatments being standard use of emollients and topical steroids, which changes little over time  
42  
43 and is constrained by prescribing guidance. This led to an assumption that there was little need to amend  
44  
45 mindlines. Eczema mindlines were developed early in their career by many practitioners and were relatively  
46  
47 static amongst GPs, PNs and HVs, except for those with direct personal experience of eczema. Mindlines of  
48  
49 pharmacy staff were regularly modified through a combination of education provided by their employer,  
50  
51 electronic updates from professional bodies and interactions with customers. The latter was particularly  
52  
53 influential for the PCSs as they generally had more time to listen and had built up trusting relationship with  
54  
55 the customers over time.  
56  
57  
58  
59  
60



BMJ Open KM Practitioner mindlines 4.7.18 for submission

1  
2  
3  
4 This study is one of few to apply mindline theory to a specific condition across a broad range of  
5  
6 practitioners. In particular it identifies important differences in the way in which eczema mindlines are  
7  
8 developed and so may best be amended for individual practitioner groups. This study conforms with  
9  
10 conventions of robust qualitative work in that it is rigorous (coherent and sufficiently well reported to be  
11  
12 open to external audit), relevant (enriches understanding of the subject), resonant (resonates with readers  
13  
14 experiences and understandings) and reflexive (subjectivity of the author is acknowledged) (44). Limitations  
15  
16 include issues of reliability as the ethnographer is a lone worker, however this is mitigated by conversations  
17  
18 with participants to check understandings. As data was collected in one general practice, findings may not  
19  
20 be transferable but the diversity of participants should minimise this risk (45). Additionally no nurse  
21  
22 practitioners were included as, at the time of data collection, none were employed in the practice.  
23  
24  
25

26  
27 As with the original conceptualisation of Gabbay and leMay (30), practitioner eczema mindlines are  
28  
29 composed over time, from a range of evidence sources which rarely embrace direct use of research.  
30  
31 Gabbay and le May (28) point to the critical nature of knowledge-in-practice-in-context in which in each  
32  
33 context new knowledge is converted by the complex social processes of the Socialization, Externalization,  
34  
35 Combination, Internalization spiral (32). Context was central in the formation of eczema mindlines but was  
36  
37 informed more by long-held beliefs and national policy than by local context. Key differences in this study  
38  
39 are that mindline development has evolved alongside the changing nature of primary care where  
40  
41 practitioners, particularly GPs, appear to work more in isolation than as part of a community with “coffee  
42  
43 room chat” (46) appearing much reduced. In parallel available online resources have spiralled thus  
44  
45 potentially reducing the need to confer with others. This challenges the notion that mindlines are heavily  
46  
47 reliant on professional interactions (28). The static nature of eczema mindlines and the beliefs  
48  
49 underpinning eczema care meant that they were accessed using fast, automatic, System 1 thinking rather  
50  
51 than the more deliberative, conscious slow and effortful System 2 approach (47).  
52  
53  
54  
55  
56  
57  
58  
59  
60

BMJ Open KM Practitioner mindlines 4.7.18 for submission

1 Few studies have investigated condition specific mindlines with the exception of a Tanzanian study of  
2 malaria diagnosis (48), however the depiction here is more akin to rules of thumb or heuristics. A  
3 comprehensive commentary on mindlines identifies 76 papers categorised as “in practice”, that is studies  
4 of how mindlines are developed, many of these used the term to mean consulting with colleagues (33). A  
5 smaller number were faithful to the original Gabbay and Le May’s conceptualisation but add little by way of  
6 new understanding. More recently Wieringa and colleagues (49) investigated mindlines development in  
7 online clinical communities concluding that they offered collective, dynamic settings and implicitly that  
8 they may be areas for mindline amendment. Whilst online communities may appeal to some practitioners,  
9 this will not be so for all.

10  
11  
12 In this study eczema was consider low priority. These beliefs are longstanding with surveys suggesting that  
13 both patients and practitioners perceive dermatology as a poor relation in healthcare (50-52) and Magin  
14 and colleagues (4) describing ‘dismissive’ and ‘unsympathetic’ attitudes amongst GPs. Eczema appears to  
15 be considered as “health problem which is not an illness” (53) and therefore less legitimate and worthy  
16 than other conditions. Ambivalence about eczema specific learning was in contrast to a survey which  
17 indicated a desire for new knowledge, particularly in the form of education delivered by consultants (54);  
18 inevitably GPs completing the survey would be those with an interest in dermatology. The dermatology  
19 community has used many strategies to make research findings accessible to all with limited success (55).  
20 In contrast with this study in which treatment for eczema was viewed as simple others report GPs  
21 uncertainty about managing eczema (56).

22  
23  
24 Achieving change in primary care practice is challenging, interventions most likely to influence practice  
25 demonstrate evidence of benefit, are simple to use and adaptable to local context (57). The context of  
26 eczema mindlines, that it is a low priority condition with a limited repertoire of treatment options, is  
27 unlikely to change in the foreseeable future. If, like other LTCs eczema was recognised in the Quality and  
28 Outcomes Framework (58) patients may benefit from the accelerated trends towards systematic  
29 management (59). Practitioners in primary care are expert generalists (60) and are expected to have

BMJ Open KM Practitioner mindlines 4.7.18 for submission

1 knowledge of many conditions for which there is wealth of available evidence. This may lead to information  
2  
3 overload for which coping strategies are needed. Bate and colleagues (61) describe “satisficing” that is,  
4  
5 curtailing the amount of information gathered to enable them to make a “good enough” decision.  
6  
7  
8  
9

10 In many ways it can be argued that treatment of eczema in primary care is relatively straightforward and  
11  
12 that amendment of mindlines to adjust thinking about emollients and removal of outdated information  
13  
14 about topical steroid use could make a significant change in practice that would improve both patient  
15  
16 experience and self-management practices. Brevity and accessibility of information is key as practitioners  
17  
18 have been found to judge the usefulness of new knowledge as function of its relevance x validity ÷ by the  
19  
20 work needed to access it (62). It is possible that straightforward messages could be conveyed through  
21  
22 media such as aphorisms, “succinct sayings that offer advice” (63) or actionable nuggets “knowledge  
23  
24 translation tools designed to provide ..... concise practical information about the most prevalent and  
25  
26 pressing primary care needs of patients” (64). This approach offers the opportunity to compensate for the  
27  
28 loss of professional wisdom through personal communication by transmitting concentrated wisdom and  
29  
30 guidance in a different way (63).  
31  
32  
33  
34

35 Efforts to amend GPs, PNs and HVs mindlines need to be accessible via rapid System 1 thinking.

36 Interventions should be specific, practical, tailored, relevant and rapidly delivered information which can  
37  
38 readily be assimilated, or as participants in this study described it, a “no faff” approach. Given their time  
39  
40 constraints and information gathering habits any new information would best be delivered individually  
41  
42 rather than in a group setting and available online and possibly in other formats.  
43  
44  
45  
46  
47

48 The role of the community pharmacist in eczema care is evolving partly in response to Pharmaceutical  
49  
50 Services Negotiating Committee guidance on Medicines Use Reviews (65), New Medicine Service (66) and  
51  
52 Minor Ailment Service (67). Forthcoming changes in availability of emollients on prescription may increase  
53  
54 their role further. Pharmacy staff described eczema mindline development as a more collective experience  
55  
56 than other practitioners and valued learning from each other and from customers. They may be open to  
57  
58  
59  
60

BMJ Open KM Practitioner mindlines 4.7.18 for submission

1 group approaches to update and remove redundant information from their mindlines and this would need  
2  
3 to be brokered through both professional and employing organisations.  
4  
5  
6  
7

## 8 **Conclusion**

9  
10 This ethnographic study provides new understandings about the development of eczema specific mindlines  
11 in different practitioner groups in primary care. The outstanding challenge is to find novel, context-specific,  
12 simple, pragmatic strategies to revise or modify these mindlines by adding reliable and useful knowledge  
13 and by erasing outdated or inaccurate information using strategies that are most appropriate to each  
14 profession. Mindline amendment has the potential to improve self-management and quality of eczema  
15 care through the delivery of consistent, evidence-based care.  
16  
17  
18  
19  
20  
21  
22  
23  
24  
25  
26  
27  
28  
29  
30  
31  
32  
33  
34  
35  
36  
37  
38  
39  
40  
41  
42  
43  
44  
45  
46  
47  
48  
49  
50  
51  
52  
53  
54  
55  
56  
57  
58  
59  
60

BMJ Open KM Practitioner mindlines 4.7.18 for submission

1  
2 **Contribution statement**

3  
4 FC is the sole contributor to this paper

5  
6 **Funding**

7  
8 This report is independent research arising from a Knowledge Mobilisation Research Fellowship, Professor  
9  
10 Fiona Cowdell, KMRF-2015-04-004 supported by the National Institute for Health Research. The views  
11  
12 expressed in this publication are those of the authors and not necessarily those of the NHS, the National  
13  
14 Institute for Health Research, Health Education England or the Department of Health.  
15

16 **Ethical approval**

17  
18 The study was approved by a National Health Service REC (16/YH/0252). Process consent was used for  
19  
20 observation, on each occasion informal conversations were used to re-check participant's willingness to be  
21  
22 observed. Patients were informed about the study by practitioners and when necessary the researcher  
23  
24 exited individual consultations, either at the request of the patient, the practitioner or using personal  
25  
26 judgment, although this was infrequently needed. Written consent was taken for audio-recorded  
27  
28 interviews. Interview participants consented to publication of anonymised information.  
29  
30

31 **Competing interests**

32  
33 None to declare  
34

35 **Acknowledgements**

36  
37 Thanks to Amanda Roberts who have given invaluable lay feedback on the planning and design of this study.  
38  
39 Thanks to James Mycock, Birmingham City University for the mindline illustration and to Professors Hywel  
40  
41 William and Stephen Timmons, University of Nottingham for their valuable feedback on earlier iterations of  
42  
43 this manuscript  
44

45 **Data sharing statement**

46  
47 The datasets generated and/or analysed during the current study are not publicly available as they are not  
48  
49 designed to be re-analysed by others but are available from the corresponding author on reasonable  
50  
51 request.  
52  
53  
54  
55  
56  
57  
58  
59  
60

BMJ Open KM Practitioner mindlines 4.7.18 for submission

## References

1. Hay RJ, Johns NE, Williams HC, et al. The global burden of skin disease in 2010: an analysis of the prevalence and impact of skin conditions. *J Invest Dermatol.* 2014; 134: 1527-1534.
2. Schofield J, Grindlay D, Williams H, Skin conditions in the UK: a health care needs assessment. Centre of Evidence Based Dermatology, University of Nottingham; 2009.
3. Cowdell F. Knowledge mobilisation: an ethnographic study of the influence of lay mindlines on eczema self-management in primary care in the United Kingdom. *BMJ Open.* In press
4. Magin P, Adams J, Heading G, Pond C. Patients with skin disease and their relationships with their doctors: a qualitative study of patients with acne, psoriasis and eczema. *Med J Aust.* 2009; 190:62-64
5. Santer M, Burgess H, Yardley L, et al. Experiences of carers managing childhood eczema and their views on its treatment: A qualitative study. *Br J Gen Pract.* 2012; 62:261-267.
6. Powell K, Le Roux E, Banks J, et al. GP and parent dissonance about the assessment and treatment of childhood eczema in primary care: a qualitative study. *BMJ Open.* 2018; 8:e019633.
7. Rüksam M, Esch M, Baum E, et al. Diagnosing skin disease in primary care: A qualitative study of GPs' approaches. *Fam Pract.* 2015; 32: 591-595.
8. Nicol NH, Ersser SJ. The role of the nurse educator in managing atopic dermatitis. *Immunol Allergy Clin.* 2010; 30:369-383.
9. Rolinck-Werninghaus C, Trentmann M, Reich A, et al. Improved management of childhood atopic dermatitis after individually tailored nurse consultations: a pilot study. *Pediat Allergy Immunol.* 2015; 26: 805-810.
10. Tucker R, Stewart D. Why people seek advice from community pharmacies about skin problems. *Int J Pharm Pract.* 2015; 23(2): 150-153.
11. Tucker RP, MacLure K, Paudyal V, et al. An exploratory study of community pharmacist diagnosis and management of dermatitis and acne. *Selfcare J.* 2017; 8(2):1-10
12. Tucker R. The medicines use review in patients with chronic skin diseases: are pharmacists doing them and how confident are they? *Int J Pharm Pract.* 2013; 21:202-204.
13. Banks J, Shaw A, Weiss MC. The community pharmacy and discursive complexity: a qualitative study of interaction between counter assistants and customers. *Health Soc Care Community.* 2007; 15:313-321.
14. Santer M, Burgess H, Yardley L, et al. Managing childhood eczema: Qualitative study exploring carers' experiences of barriers and facilitators to treatment adherence. *J Adv Nurs.* 2013; 69:2493-2501.
15. Teasdale EJ, Muller I, Santer M. 2017. Carers' views of topical corticosteroid use in childhood eczema: a qualitative study of online discussion forums. *Br J Dermatol.* 2017; 176(6):1500-1507.
16. Global Resource for Eczema Trials (GREAT) database <http://www.greatdatabase.org.uk/GD4/Home/Index.php> Accessed 4.7.18
17. National Institute of Health and Care Excellence. Atopic eczema in under 12s: diagnosis and management. Clinical guideline [CG57] 2007 <https://www.nice.org.uk/Guidance/CG57>. Accessed 4.7.18
18. Powell K, Le Roux E, Banks JP, et al. Developing a written action plan for children with eczema: A qualitative study. *Brit J Gen Pract.* 2018; 68(667):e81-e89.
19. Department of Health 2014 The Mandate: A mandate from the Government to NHS England: April 2014 – March 2015 [https://www.gov.uk/government/uploads/system/uploads/attachment\\_data/file/383495/2902896\\_DoH\\_Mandate\\_Accessible\\_v0.2.pdf](https://www.gov.uk/government/uploads/system/uploads/attachment_data/file/383495/2902896_DoH_Mandate_Accessible_v0.2.pdf) Accessed 4.7.18
20. Ridd MJ, King AJL, Le Roux E, et al. Systematic review of self-management interventions for people with eczema. *Br J Dermatol.* 2017; 177(3):719-734.
21. Hanlon P, Daines L, Campbell C. et al. Telehealth interventions to support self-management of long-term conditions: a systematic metareview of diabetes, heart failure, asthma, chronic obstructive pulmonary disease, and cancer. *JMIR.* 2017; 19:e172.

## BMJ Open KM Practitioner mindlines 4.7.18 for submission

22. Sackett, DL, Rosenberg WM, Gray JM, et al. Evidence based medicine: what it is and what it isn't. *BMJ*. 1996; 312:71-2.
23. Greenhalgh T, Howick J, Maskrey N. "Evidence based medicine: a movement in crisis?" *BMJ* 348 (2014): g3725.
24. Brownson RC, Colditz GA, Proctor EK. eds. Dissemination and implementation research in health: translating science to practice. Oxford: Oxford University Press; 2017.
25. Vaucher C, Bovet E, Bengough T, et al. Meeting physicians' needs: a bottom-up approach for improving the implementation of medical knowledge into practice. *Health Res Policy Syst*. 2016; 14:49.
26. Ward V. 2017. Why, whose, what and how? A framework for knowledge mobilisers. *Evid Policy*. 2017; 13:477-497.
27. Ferlie E, Crilly T, Jashapara A, et al. Knowledge mobilisation in healthcare: a critical review of health sector and generic management literature. *Soc Sci Med*. 2012;74:1297-1304.
28. Gabbay J, Le May A. Practice-based evidence for healthcare: clinical mindlines. London: Routledge; 2010.
29. Plamondon K, Caxaj S. 2018. Toward Relational Practices for Enabling Knowledge-to-action in Health Systems: The Example of Deliberative Dialogue. *Adv Nurs Sci*. 2018; 41:18-29.
30. Gabbay J, le May A. Evidence based guidelines or collectively constructed "mindlines?" Ethnographic study of knowledge management in primary care. *BMJ*. 2004; 329:1013.
31. Polanyi M. The logic of tacit inference. *Philos*. 1966; 41:1-18.
32. Nonaka I, Takeuchi H. The knowledge-creating company: How Japanese companies create the dynamics of innovation. Oxford: Oxford University Press; 1995.
33. Wieringa S, Greenhalgh T. 10 years of mindlines: a systematic review and commentary. *Imp Sci*. 2015; 10:45.
34. Hammersley M, Atkinson P. *Ethnography: Principles in Practice*. Abingdon: Routledge; 2007.
35. Spradley JP. *Participant observation*. Illinois: Waveland Press; 2016.
36. Spradley JP. *The ethnographic interview*. Illinois: Waveland Press; 2016.
37. Cowdell F. That's how we do it we treat them all the same: An exploration of the experiences of patients, lay carers and health and social care staff of the care of people with dementia in acute hospital settings. Cambridge. Cambridge Publishing. 2013.
38. Tongco MD. Purposive sampling as a tool for informant selection. *Ethnobotany Research and Applications*. 2007. 31; 5:147-58.
39. O'Reilly M, Parker N. 'Unsatisfactory Saturation': a critical exploration of the notion of saturated sample sizes in qualitative research. *Qual Res*. 2013; 13:190-197.
40. Clinical Knowledge Summaries. Eczema – atopic <https://cks.nice.org.uk/eczema-atopic> Accessed 4.7.18
41. GP Notebook. Eczema <http://www.gpnotebook.co.uk/simplepage.cfm?ID=-623902719> Accessed 4.7.18
42. Polkinghorne DE. Language and meaning: Data collection in qualitative research. *J Couns Psychol*, 2005; 52(2):137.
43. Matua GA, Van Der Wal DM. Differentiating between descriptive and interpretive phenomenological research approaches. *Nur Res*. 2015; 22(6):22.
44. Finlay L. *Phenomenology for psychotherapists: Researching the lived world*. Oxford: Wiley Blackwell; 2011.
45. University of Hertfordshire 2017 Disadvantages of Ethnographic Research [http://www.health.herts.ac.uk/immunology/Web%20programme%20-%20Researchhealthprofessionals/disadvantages\\_associated\\_with\\_et.htm](http://www.health.herts.ac.uk/immunology/Web%20programme%20-%20Researchhealthprofessionals/disadvantages_associated_with_et.htm). Accessed 4.7.18
46. Gabbay J, le May. Mindlines: making sense of evidence in practice. *B J Gen Pract*. 2016: 402-403.
47. Kahneman D. *Thinking, Fast and Slow*. London: Penguin; 2011.
48. Chandler CI, Jones C, Boniface G et al. Guidelines and mindlines: why do clinical staff over-dignose malaria in Tanzania? A qualitative study. *Malar J* 2008;7:53
49. Wieringa S, Engebretsen E, Heggen K, et al. How knowledge is constructed and exchanged in virtual communities of physicians: qualitative study of mindlines online. *JMIR*. 2018;20: e34.

## BMJ Open KM Practitioner mindlines 4.7.18 for submission

- 1
- 2
- 3 50. Rosoff SM, Leone MC. (1989). The prestige of dermatologists. are they "last among equals"? *Int J Dermatol.* 1989; 28:377-380.
- 4
- 5 51. Rosoff SM, Leone MC (1991). The public prestige of medical specialties: Overviews and
- 6 undercurrents. *Soc Sci Med.* 1991;32:321-326.
- 7 52. Creed PA, Searle J, Rogers ME. Medical specialty prestige and lifestyle preferences for medical
- 8 students. *Soc Sci Med.* 2010;71:1084-8.
- 9 53. Cornwell J. *Hard-earned lives: accounts of health and illness from East London*:Routledge Kegan &
- 10 Paul;1984.
- 11 54. Soriano LF, Sahota A, Jolliffe V. An evaluation of general practitioners learning preferences in
- 12 dermatology. *Education for Primary Care.* 2017; 17:1-2.
- 13 55. Baron SE, Cohen SN, Archer CB. Guidance on the diagnosis and clinical management of atopic
- 14 eczema. *Clin Exp Dermatol.* 2012; 37:Suppl 1, 7-12.
- 15 56. Le Roux, E, Powell K, Banks JP, et al. GPs' experiences of diagnosing and managing childhood
- 16 eczema: a qualitative study in primary care. *Br J Gen Pract.* 2018. Feb 16:bjgp18X694529.
- 17 57. Lau R, Stevenson F, Ong BN, et al. Achieving change in primary care—causes of the evidence to
- 18 practice gap: systematic reviews of reviews. *Imp Sci.* 2015;11:40.
- 19 58. National Institute for Health and Care Excellence (2018) NICE Quality and Outcomes Framework
- 20 indicator <https://www.nice.org.uk/standards-and-indicators/qofindicators> Accessed 4.7.18
- 21 59. Roland M, Guthrie B. Quality and Outcomes Framework: what have we learnt? *BMJ* 2016;354:i4060
- 22 60. Reeve J, Dowrick CF, Freeman GK, et al. Examining the practice of generalist expertise: a qualitative
- 23 study identifying constraints and solutions. *JRSM short reports.* 2013; 4(12):2042533313510155.
- 24 61. Bate L, Hutchinson A, Underhill J, et al. How clinical decisions are made. *Br J Clin Pharmacol.* 2012;
- 25 74:614-20.
- 26 62. Cunningham M, Shirley A. Mindlines in a digital age. *Education for Primary Care.* 2015; 26:293-6.
- 27 63. Levine D, Bleakley A. Maximising medicine through aphorisms. *Med Educ.* 2012; 46:153-162
- 28 64. McColl MA, Aiken A, Smith K, et al. Actionable nuggets: knowledge translation tool for the needs of
- 29 patients with spinal cord injury. *Can Fam Physician.* 2015; 61:e240-e248.
- 30 65. Pharmaceutical Services Negotiating Committee Medicines Use Review
- 31 <http://psnc.org.uk/services-commissioning/advanced-services/murs/> Accessed 4.7.18
- 32 66. Pharmaceutical Services Negotiating Committee New Medicine Service [http://psnc.org.uk/services-](http://psnc.org.uk/services-commissioning/advanced-services/nms/)
- 33 [commissioning/advanced-services/nms/](http://psnc.org.uk/services-commissioning/advanced-services/nms/) Accessed 4.7.18
- 34 67. Pharmaceutical Services Negotiating Committee Minor Ailment Service
- 35 [http://psnc.org.uk/services-commissioning/locally-commissioned-services/en8-minor-ailments-](http://psnc.org.uk/services-commissioning/locally-commissioned-services/en8-minor-ailments-service/)
- 36 [service/](http://psnc.org.uk/services-commissioning/locally-commissioned-services/en8-minor-ailments-service/) Accessed 4.7.18
- 37
- 38
- 39
- 40
- 41
- 42
- 43
- 44
- 45
- 46
- 47
- 48
- 49
- 50
- 51
- 52
- 53
- 54
- 55
- 56
- 57
- 58
- 59
- 60



BMJ Open KM Practitioner mindlines 4.7.18 for submission

1  
2  
3  
4  
5  
6  
7  
8  
9  
10  
11  
12  
13  
14  
15  
16  
17  
18  
19  
20  
21  
22  
23  
24  
25  
26  
27  
28  
29  
30  
31  
32  
33  
34  
35  
36  
37  
38  
39  
40  
41  
42  
43  
44  
45  
46  
47  
48  
49  
50  
51  
52  
53  
54  
55  
56  
57  
58  
59  
60

Peer review only

BMJ Open KM Practitioner mindlines 4.7.18 for submission

1  
2 **Table 1:** Practitioner interview topic guide

3  
4 **Table 2:** Demographic details of participants

5  
6 **Figure 1:** Practitioner eczema mindlines

7  
8 Sources of information underpinning practitioner eczema mindlines.  
9  
10  
11  
12  
13  
14  
15  
16  
17  
18  
19  
20  
21  
22  
23  
24  
25  
26  
27  
28  
29  
30  
31  
32  
33  
34  
35  
36  
37  
38  
39  
40  
41  
42  
43  
44  
45  
46  
47  
48  
49  
50  
51  
52  
53  
54  
55  
56  
57  
58  
59  
60

For peer review only

1  
2  
3  
4  
5  
6  
7  
8  
9  
10  
11  
12  
13  
14  
15  
16  
17  
18  
19  
20  
21  
22  
23  
24  
25  
26  
27  
28  
29  
30  
31  
32  
33  
34  
35  
36  
37  
38  
39  
40  
41  
42  
43  
44  
45  
46  
47  
48  
49  
50  
51  
52  
53  
54  
55  
56  
57  
58  
59  
60

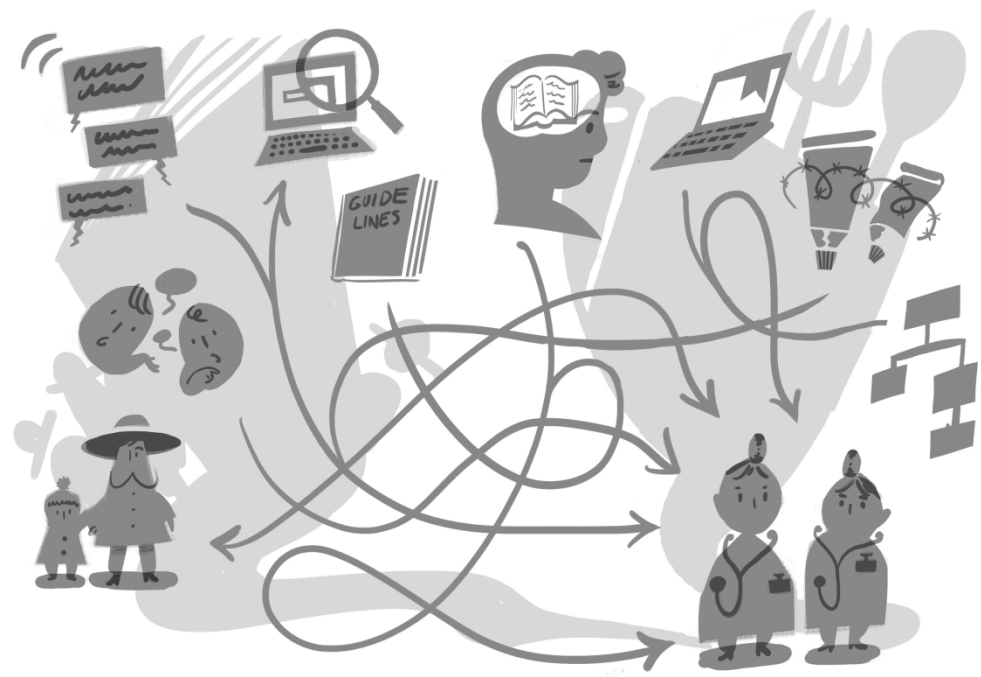

Practitioner eczema mindlines  
742x524mm (120 x 120 DPI)

## BMJ Open Practitioner eczema mindlines COREQ 4.7.18

## COREQ Statement

Knowledge mobilisation: An ethnographic study of the influence of practitioner mindlines on eczema self-management in primary care in the United Kingdom

| Statement                                                                                                                                                                                                                                                                                                                                                                                                                                                        | Page no    |
|------------------------------------------------------------------------------------------------------------------------------------------------------------------------------------------------------------------------------------------------------------------------------------------------------------------------------------------------------------------------------------------------------------------------------------------------------------------|------------|
| <b>Domain 1: Research team and reflexivity</b>                                                                                                                                                                                                                                                                                                                                                                                                                   |            |
| <i>Personal Characteristics</i>                                                                                                                                                                                                                                                                                                                                                                                                                                  |            |
| 1. Interviewer/facilitator Which author/s conducted the interview or focus group?<br>I conducted all observation and interviews                                                                                                                                                                                                                                                                                                                                  | 6          |
| 2. Credentials What were the researcher's credentials? E.g. PhD, MD<br>DProf, RN                                                                                                                                                                                                                                                                                                                                                                                 | Title page |
| 3. Occupation What was their occupation at the time of the study?<br>Professor of Nursing and Health Research                                                                                                                                                                                                                                                                                                                                                    | Title page |
| 4. Gender Was the researcher male or female?<br>Female                                                                                                                                                                                                                                                                                                                                                                                                           | Title page |
| 5. Experience and training What experience or training did the researcher have?<br>I have extensive experience in qualitative research.                                                                                                                                                                                                                                                                                                                          | Title page |
| <i>Relationship with participants</i>                                                                                                                                                                                                                                                                                                                                                                                                                            |            |
| 6. Relationship established Was a relationship established prior to study commencement?<br>I established rapport with each observational participant at each meeting and with interviewees at the time of interview.                                                                                                                                                                                                                                             | 6          |
| 7. Participant knowledge of the interviewer<br>What did the participants know about the researcher? e.g. personal goals, reasons for doing the research<br>I met the team prior to observation, provided an information sheet, explained about myself and the study and answered questions. I gave interview participants an information sheet prior to interviews and answered any questions, I reiterated this information at the beginning of each interview. | 6          |
| 8. Interviewer characteristics What characteristics were reported about the interviewer/facilitator? e.g. Bias, assumptions, reasons and interests in the research topic<br>Participants were aware, and it is reported in the manuscript, that I am a Registered Nurse with an interest in how eczema knowledge is developed and shared between patients and practitioners in primary care and that this was a publically funded study.                         | 8          |
| <b>Domain 2: study design</b>                                                                                                                                                                                                                                                                                                                                                                                                                                    | 5          |
| <i>Theoretical framework</i>                                                                                                                                                                                                                                                                                                                                                                                                                                     |            |
| 9. Methodological orientation and theory<br>What methodological orientation was stated to underpin the study? e.g. grounded theory, discourse analysis, ethnography, phenomenology, content analysis<br>In the methods section I explain that this is an ethnographic study using observation and interviews and that data analysis followed an ethnographic approach through the lenses of mindlines and self-management.                                       |            |
| Participant selection                                                                                                                                                                                                                                                                                                                                                                                                                                            | 6          |
| 10. Sampling How were participants selected? e.g. purposive, convenience, consecutive, snowball<br>I collected observational data during 250 hours in the practice. I selected interview participants using maximum variation purposive sampling to ensure a mix of profession, gender and years in practice.                                                                                                                                                    |            |
| 11. Method of approach How were participants approached? e.g. face-to-face, telephone, mail, email<br>Observation participants were recruited at the beginning of each encounter with the practice. I recruited interview participants from the practice and local pharmacy.                                                                                                                                                                                     | 6          |
| 12. Sample size How many participants were in the study?<br>Observation involved many participants and 16 interviews were completed                                                                                                                                                                                                                                                                                                                              | 6          |
| 13. Non-participation How many people refused to participate or dropped out? Reasons?<br>On occasion I exited consultations at the request of the patient, practitioner or of my own volition<br>A few practitioners declined to take part in interviews due to time constraints.                                                                                                                                                                                | 5          |
| <i>Setting</i>                                                                                                                                                                                                                                                                                                                                                                                                                                                   |            |
| 14. Setting of data collection Where was the data collected? e.g. home, clinic, workplace<br>Observational data was collected in a GP practice. Interviews were conducted in their workplace.                                                                                                                                                                                                                                                                    | 6          |
| 15. Presence of non-participants Was anyone else present besides the participants and researchers?                                                                                                                                                                                                                                                                                                                                                               | 6          |

## BMJ Open Practitioner eczema mindlines COREQ 4.7.18

|    |                                                                                                                                                            |         |
|----|------------------------------------------------------------------------------------------------------------------------------------------------------------|---------|
| 1  | Observational data involved numerous individuals. Interviews were conducted individually.                                                                  |         |
| 2  | 16. Description of sample What are the important characteristics of the sample? e.g. demographic data, date                                                | Table 2 |
| 3  | Interview participants were sampled by profession, gender and years in practice.                                                                           |         |
| 4  | <i>Data collection</i>                                                                                                                                     | Table 1 |
| 5  | 17. Interview guide Were questions, prompts, guides provided by the authors? Was it pilot tested?                                                          |         |
| 6  | A topic guide was used for interviews                                                                                                                      |         |
| 7  | 18. Repeat interviews Were repeat interviews carried out? If yes, how many?                                                                                | NA      |
| 8  | No repeat interviews were carried out                                                                                                                      |         |
| 9  | 19. Audio/visual recording Did the research use audio or visual recording to collect the data?                                                             | 6       |
| 10 | Interviews were audio recorded and observational data recorded in field notes                                                                              |         |
| 11 | 20. Field notes Were field notes made during and/or after the interview or focus group?                                                                    | 6       |
| 12 | 21. Duration What was the duration of the interviews or focus group?                                                                                       | 6       |
| 13 | Interviews lasted from 22-40 minutes                                                                                                                       |         |
| 14 | 22. Data saturation Was data saturation discussed?                                                                                                         | 8       |
| 15 | Data sufficiency was achieved when no new sources of knowledge were identified in interviews.                                                              |         |
| 16 | 23. Transcripts returned Were transcripts returned to participants for comment and/or correction?                                                          | NA      |
| 17 | No                                                                                                                                                         |         |
| 18 | <b>Domain 3: analysis and findings</b>                                                                                                                     | 8       |
| 19 | <i>Data analysis</i>                                                                                                                                       |         |
| 20 | 24. Number of data coders How many data coders coded the data?                                                                                             |         |
| 21 | I analysed the data independently and subsequently discussed with research, clinical and lay colleagues who corroborated initial interpretations.          |         |
| 22 | 25. Description of the coding tree Did authors provide a description of the coding tree?                                                                   | NA      |
| 23 | No                                                                                                                                                         |         |
| 24 | 26. Derivation of themes Were themes identified in advance or derived from the data?                                                                       | 8       |
| 25 | Themes were derived inductively from the data                                                                                                              |         |
| 26 | 27. Software What software, if applicable, was used to manage the data?                                                                                    | NA      |
| 27 | No                                                                                                                                                         |         |
| 28 | 28. Participant checking Did participants provide feedback on the findings?                                                                                | NA      |
| 29 | No                                                                                                                                                         |         |
| 30 | <i>Reporting</i>                                                                                                                                           | 9 - 14  |
| 31 | 29. Quotations presented Were participant quotations presented to illustrate the themes / findings? Was each quotation identified? e.g. participant number |         |
| 32 | Quotations are provided and profession of participant is identified.                                                                                       |         |
| 33 | 30. Data and findings consistent Was there consistency between the data presented and the findings?                                                        | 9 - 14  |
| 34 | Yes.                                                                                                                                                       |         |
| 35 | 31. Clarity of major themes Were major themes clearly presented in the findings?                                                                           | 9 - 14  |
| 36 | Yes.                                                                                                                                                       |         |
| 37 | 32. Clarity of minor themes Is there a description of diverse cases or discussion of minor themes?                                                         | 9 - 14  |
| 38 | Yes, I present a spectrum of practitioners and variations of mindlines.                                                                                    |         |

# BMJ Open

## Knowledge mobilisation: An ethnographic study of the influence of practitioner mindlines on atopic eczema self-management in primary care in the United Kingdom

|                                 |                                                                                                             |
|---------------------------------|-------------------------------------------------------------------------------------------------------------|
| Journal:                        | <i>BMJ Open</i>                                                                                             |
| Manuscript ID                   | bmjopen-2018-025220.R1                                                                                      |
| Article Type:                   | Research                                                                                                    |
| Date Submitted by the Author:   | 15-Mar-2019                                                                                                 |
| Complete List of Authors:       | Cowdell, Fiona; Birmingham City University, Faculty of Health Education and Life Sciences                   |
| <b>Primary Subject Heading</b>: | Dermatology                                                                                                 |
| Secondary Subject Heading:      | Evidence based practice, General practice / Family practice, Health services research, Qualitative research |
| Keywords:                       | Ethnography, Knowledge mobilisation, Mindlines, PRIMARY CARE, Self-management, Atopic eczema                |
|                                 |                                                                                                             |

SCHOLARONE™  
Manuscripts

Clean copy BMJ Open KM Practitioner mindlines R1 15.3.19 2

**Article title:** Knowledge mobilisation: An ethnographic study of the influence of practitioner mindlines on atopic eczema self-management in primary care in the United Kingdom

**Author information:**

Fiona Cowdell

DProf, RN

Professor of Nursing and Health Research

Faculty of Health, Education and Life Sciences

Birmingham City University

220 Ravensbury House

Westbourne Road

Edgbaston

Birmingham

B15 3TN

UK

Telephone: +44 (0)121 300 4345

Email: [Fiona.cowdell@bcu.ac.uk](mailto:Fiona.cowdell@bcu.ac.uk)

[orcid.org/0000-0002-9355-8059](https://orcid.org/0000-0002-9355-8059)

**Word count:** 5324

**Number of figures and tables:** one figure and four tables

**Keywords:** atopic eczema, ethnography, knowledge mobilisation, mindlines, primary care, self-management

**Disclaimer and source of support:**

This report is independent research arising from a Knowledge Mobilisation Research Fellowship, Professor Fiona Cowdell, KMRF-2015-04-004 supported by the National Institute for Health Research. The views expressed in this publication are those of the authors and not necessarily those of the NHS, the National Institute for Health Research, Health Education England or the Department of Health.

Clean copy BMJ Open KM Practitioner mindlines R1 15.3.19 2

## **Knowledge mobilisation: an ethnographic study of the influence of practitioner mindlines on atopic eczema self-management in primary care in the United Kingdom**

### **Abstract**

**Objective:** To explore how atopic eczema specific mindlines are developed by primary care practitioners.

**Design:** Ethnographic study.

**Setting:** One large, urban general practice in central England.

**Participants:** In observation, all practitioners and support staff in the practice and in interviews a diverse group of practitioners (n=16).

**Results:** Observation of over 250 hours and interview data were combined and analysed using an ethnographic approach through the lenses of mindlines and self-management. Three themes were identified: beliefs about eczema, eczema knowledge and approaches to self-management. Eczema mindlines are set against a backdrop of it being a low priority and not managed as a long-term condition. Practitioners believed that eczema is a simple to manage with little change in treatments available and prescribing limited by local formularies. Practice is largely based on tacit knowledge and experience. Self-management is expected but not often explicitly facilitated. Clinical decisions are made from knowledge accumulated over time. Societal and technological developments have altered the way in which practitioner mindlines are developed; in eczema, for most, they are relatively static.

**Conclusions:** The outstanding challenge is to find novel, profession and context-specific, simple, pragmatic strategies to revise or modify practitioner mindlines by adding reliable and useful knowledge and by erasing outdated or inaccurate information thus potentially improve quality of eczema care.

### **Strengths and limitations**

- First ethnographic study to examine the development of atopic eczema specific mindlines
- Diverse sample primary care practitioners
- Ethnographer was a lone researcher
- Results may be context specific



Clean copy BMJ Open KM Practitioner mindlines R1 15.3.19 2

## Introduction

Atopic eczema (hereafter “eczema”) is a common, long-term skin condition affecting around one in five children and one in twelve adults in the United Kingdom (UK). It can have a detrimental impact on wellbeing and quality of life and globally is one of the fifty most burdensome diseases (1). Eczema is mainly treated in primary care (2). People may seek advice from general practitioners (GPs), practice nurses (PNs), nurse practitioners (NPs), health visitors (HVs), community pharmacists (CP) and pharmacy counter staff (PCS).

GP consultations are often unsatisfactory for both patient (3) and practitioner (4, 5) with GPs dominating encounters and using avoidance tactics (6) and there being significant dissonance between patient / parent and GP beliefs about assessment and treatment (6). Many GPs have limited specialist dermatology knowledge (7). Nurse consultations, albeit in secondary care, tend to be more positively evaluated (8, 9) and minimal research has been conducted into the contribution of HVs. Research into the role of the CP in dermatology care is limited (10) and expertise may be suboptimal (11) despite CPs reporting being at least reasonably confident in their role (12). The role of the pharmacy counter assistant is equally under-researched although they are often first point of contact for customers and may offer health advice independent of pharmacists (10, 13).

The mainstay of eczema treatment is the regular application of emollients, at least daily and often for many years, with or without intermittent topical steroids and calcineurin inhibitors. Non-adherence results from the high self-management demand of applying topical treatments (14) but also lack of information and conflicting advice from different health professionals (15). Despite available evidence (for example the Global Resource for Eczema Trials database (16) and the National Institute for Health and Care Excellence, Guideline for Eczema (17)) providing evidence-based treatment appears to be a challenge for health professionals managing eczema (18).

Clean copy BMJ Open KM Practitioner mindlines R1 15.3.19 2

1  
2 Self-management is a policy imperative which can improve disease outcomes and quality of life for people  
3  
4 living with long-term conditions (19). Strategies to support eczema self-management are poorly  
5  
6 understood, have limited availability, can be costly and have variable impact (20). Eczema is not classified  
7  
8 as a long-term condition in the same way as other illnesses for example asthma (21).  
9

10  
11  
12  
13 Primary care practitioners are expected to deliver evidence-based practice (EBP). Evidence based medicine  
14  
15 (EBM) was originally the preserve of doctors and was defined as “the conscientious, explicit, and judicious  
16  
17 use of current best evidence in making decisions about the care of individual patients” (22). Over time,  
18  
19 other professions have embraced EBP but this has, at times, been conceptualised as a set of research-based  
20  
21 facts which if disseminated to practitioners will ensure more standardised, high quality care (23); this  
22  
23 notion is now largely dismissed (24). Primary care practitioners face particular challenges in EBP given the  
24  
25 volume of information they need and information overload is a real problem (25).  
26  
27  
28  
29

30  
31 The study of knowledge mobilisation (KM) is growing exponentially in health care, at its simplest it is  
32  
33 “moving knowledge to where it can be most useful” (26). KM involves determined efforts to create, share  
34  
35 and use research and other forms of knowledge predicated on the understanding that to be effective KM  
36  
37 activity must be relational, constructed from social interaction and context-specific (27-29).  
38  
39  
40  
41

42 Mindlines, developed from a primary care based ethnographic study (30) offer a “real world” approach to  
43  
44 mobilising knowledge and changing clinical practice. Mindlines are “collectively reinforced, internalised  
45  
46 tacit guidelines” which underpin clinical decision-making (30). They build on the work of Polyani (31) and  
47  
48 Nonaka and Takeuchi (32) who propose that knowledge is not necessarily conscious and explicit, and that  
49  
50 tacit knowledge in the form of unconscious schemata and technical know-how are dominant influencers of  
51  
52 action compared with formal codified knowledge. Gabbay and LeMay (28) suggest that mindlines are based  
53  
54 on flexible, embodied and intersubjective understanding of knowledge that is grounded in the acceptance  
55  
56 that there are multiple realities and that knowledge is context-specific. Mindlines represent a complex  
57  
58 amalgamation of knowledge gathered from many sources for example, communication with colleagues and  
59  
60

Clean copy BMJ Open KM Practitioner mindlines R1 15.3.19 2

1  
2 opinion leaders in the field and from tacit knowledge developed over time (28). In their original work,  
3  
4 Gabbay and LeMay (30) examined the construction of mindlines across primary care. A subsequent  
5  
6 synthesis of 10 years of mindline literature (n=340) reports that they have been conceptualised and used in  
7  
8 four distinct ways. “Nominal” in which the term was used in name only, sometimes with a degree of  
9  
10 scepticism, “in practice” examining how mindlines are developed and spread in everyday practice,  
11  
12 “theoretical and philosophical” in which the aim was to extend existing theory and “solution focused”,  
13  
14 exploring ways in which mindlines can be influenced. Solution focused papers (n=28) emphasise the  
15  
16 importance of collaborative learning, relationship building and effective leadership in the development of  
17  
18 valid, collective, evidence-based mindlines. This review reveals a paucity of information about development  
19  
20 or strategies to amend condition specific mindlines (33). Repeating the search strategy utilised for this  
21  
22 review in 2018 revealed an abundance of further related literature but little directly addressing condition  
23  
24 specific mindlines or how they may best be amended.  
25  
26  
27  
28  
29  
30

31 Given the prevalence of eczema, the challenges of primary care consultations and the high self-  
32  
33 management demand, it is prudent to investigate the way in which eczema mindlines are constructed by  
34  
35 practitioners. This will inform understanding of mindlines “in practice” and will underpin future “solution  
36  
37 focused” work to develop novel, context-specific, simple and pragmatic strategies to revise or modify  
38  
39 eczema mindlines by adding reliable and useful knowledge and by erasing outdated or inaccurate  
40  
41 information thus potentially improve quality of eczema care and self-management.  
42  
43  
44  
45  
46

## 47 **Method**

### 48 *Aim*

49 To understand construction of healthcare practitioner atopic eczema mindlines in primary care.

### 50 *Design*

51 An ethnographic approach was employed. Ethnography is founded in anthropology and is concerned with  
52  
53 the systematic study of people and cultures (34). Data is collected through extensive observation with  
54  
55  
56  
57  
58  
59  
60

Clean copy BMJ Open KM Practitioner mindlines R1 15.3.19 2

informal conversations, field notes and interviews (35, 36). Data was collected in one large general practice in England.

### *Setting, participants and process*

Data were collected by the author, a nurse and researcher, from January - June 2017. The General Practice was identified by a local clinical research network. It was a research and education active urban general practice in a demographically diverse and deprived area of England with a patient population of approximately 10,000. Observations were also conducted in a community pharmacy adjacent to the practice, which was used by most patients. No practitioners reported a special interest in dermatology. In preparation for data collection the researcher attended two practice meetings to outline conduct of the study. Data were collected in more than 250 hours of observation during all surgery opening hours. The role of social-participant-as-observer, that is, predominantly observer with some social functions such as cleaning couches was taken (37). Observation began with the reception team to understand the day-to-day working of the practice. Observation of consultations with GPs, GP trainees and locums, nurses, health visitors in baby clinics, held on the practice premises, and pharmacy staff followed. GP telephone consultations were listened to and discussed with the practitioner. Field notes were documented and informal conversations either written contemporaneously or audio-recorded. Entire clinics were attended regardless of presenting complaint, to gain understanding in the context of other long-term conditions. Between consultations practitioners recounted recent eczema consultations. Available documentation was reviewed. Single, semi-structured interviews using a topic guide (Table 1) were conducted with practitioners from each profession (n=16) (Table 2) using maximum variation purposive sampling (38) to ensure a mix of job role and level of experience. A predominance of female participants was reflective of the profile of the healthcare team. The complete dataset is summarised in Table 3.

Table 1: Practitioner interview topic guide

- Do you have any special interest in skin health?
- How much contact do you have with patients with eczema?

## Clean copy BMJ Open KM Practitioner mindlines R1 15.3.19 2

- What sort of treatments do you use most often?
- How do you decide on a particular treatment?
  - What impact does the local formulary have on your prescribing?
- How much are you able to advise patients on how to care for their eczema?
  - Concordance etc
- How do you update your own knowledge about eczema?
- How could we best get research information to use in your practice?
  - What methods do you use now?
  - Can you give any specific examples?
- Do patients come with their own ideas about the treatment they need?
- How much do you and your patient share the decision about what treatment to use?
- How do you reconcile patient's needs with what is available?
- Do you refer patients to any external sources of information?

Table 2: Demographic details of interview participants

| Role                   | Gender | Years in current role |
|------------------------|--------|-----------------------|
| Health visitor         | Female | 10                    |
| GP                     | Male   | 35                    |
| GP Trainee             | Female | 2                     |
| Practice nurse         | Female | 31                    |
| Practice nurse         | Female | 32                    |
| Pharmacist             | Male   | 8                     |
| GP Trainee             | Female | 5                     |
| Pharmacist             | Female | 12                    |
| Pharmacy counter staff | Female | 10                    |
| Pharmacy counter staff | Female | 17                    |

Clean copy BMJ Open KM Practitioner mindlines R1 15.3.19 2

|                |        |   |
|----------------|--------|---|
| GP Trainee     | Female | 7 |
| GP             | Female | 6 |
| GP             | Female | 5 |
| Health visitor | Female | 2 |
| Health visitor | Female | 2 |
| Health visitor | Female | 3 |

Table 3: Complete dataset

|                                                                                                                                                                                                                                                                                                                                                                                                                                                                                                                                                                                                                                                                  |
|------------------------------------------------------------------------------------------------------------------------------------------------------------------------------------------------------------------------------------------------------------------------------------------------------------------------------------------------------------------------------------------------------------------------------------------------------------------------------------------------------------------------------------------------------------------------------------------------------------------------------------------------------------------|
| <p><b>Observations and informal interviews</b></p> <p>1 General practice</p> <p>10 sessions observing reception and waiting room</p> <p>9 sessions observing in baby clinics</p> <p>2 sessions observing in community pharmacy</p> <p>24 sessions observing GPs</p> <p>5 sessions with practice manager</p> <p>Multiple informal meetings and one to one informal discussions</p> <p>4 practice meetings</p> <p>6 debriefs with GP trainees</p> <p><b>Formal interviews</b></p> <p>16, details provided in table 2</p> <p><b>Documentary sources</b></p> <p>Local prescribing guidelines</p> <p>Online guidance accessed by practitioners during observation</p> |
|------------------------------------------------------------------------------------------------------------------------------------------------------------------------------------------------------------------------------------------------------------------------------------------------------------------------------------------------------------------------------------------------------------------------------------------------------------------------------------------------------------------------------------------------------------------------------------------------------------------------------------------------------------------|

Interviews were conducted in the workplace and lasted from 22-40 minutes. Data sufficiency was achieved when no new insights were forthcoming (39). For completeness documents and websites were reviewed

Clean copy BMJ Open KM Practitioner mindlines R1 15.3.19 2

including the NICE Clinical Guideline for Eczema (17), the local emollient formulary and the Clinical

Knowledge Summary (40) and GP notebook pages (41) for eczema.

Data collection and analysis were iterative with initial findings being used to guide further collection (42).

Audio-data were professionally transcribed and transcripts read against the recording by the researcher to confirm accuracy. Data analysis was completed independently by the researcher, though the lenses of mindlines and self-management. Transcripts and field notes were read in full to get a sense of the data as a whole, and then manually coded, categorised and merged into themes and annotated with researcher inductive interpretations (see table 4 for worked example). Post theme development, relevant sections of the data were revisited to ensure authentic interpretation and use of participant language.

Table 4: Example of data analysis process

| Codes (from interview and observational data)                                                                                                                                                                                           | Categories                | Theme                |
|-----------------------------------------------------------------------------------------------------------------------------------------------------------------------------------------------------------------------------------------|---------------------------|----------------------|
| GP interview<br>• Eczema “simple to treat” nothing much has changed over the years – it’s bread and butter to us                                                                                                                        | It’s simple to treat      | Beliefs about eczema |
| HV interview<br>• Basics are the same, but there’s lots of personal preference                                                                                                                                                          |                           |                      |
| GP interview<br>• Common complaint “know by heart”                                                                                                                                                                                      |                           |                      |
| Observational data<br>• Perception from GPs that it’s a straightforward condition, treatment is fairly standard and that there is limited need for further knowledge. Intranet rarely used but fairly standard set of resources for GPs |                           |                      |
| GP interview<br>• Software will fire up a message if another product should be used                                                                                                                                                     | No need to think too much |                      |
| Pharmacist interview<br>• Script Switch – computer tells you if you are prescribing the wrong thing and suggests an alternative                                                                                                         |                           |                      |
| Observational data<br>• Belief that guidance is more about cost that research                                                                                                                                                           |                           |                      |
| Observational data<br>• Eczema is not a condition that is mentioned in “learning” interactions such as debriefs                                                                                                                         |                           |                      |

### *Reflexivity*

Reflexivity was maintained throughout the study with particular attention being paid to subjectivity and positioning as a nurse and skin health researcher; pre-understandings were consciously set aside (43).

Clean copy BMJ Open KM Practitioner mindlines R1 15.3.19 2

### *Patient and Public Involvement*

Lay people, from an eczema support group, were involved in the development of the research question and in planning the design of the study. They contributed through one meeting and a series of email exchanges.

### **Results**

Data analysis resulted in three themes: beliefs about eczema; eczema knowledge and approaches to self-management. Each is discussed with examples from the data below.

#### *Theme 1: Beliefs about eczema*

Eczema was consistently viewed as a “*bread and butter*” [GP] condition that accounted for many consultations. However, although 19.5% of the practice population was recorded as having some type of eczema few consultations primarily for this condition were observed. Analysis of patient reported reason for GP consultation for a typical week during observation revealed that 26/627 (4.1%) of reasons were skin related with none citing eczema as the primary complaint. No observed face-to-face consultations were primarily for eczema; it was reported as a secondary concern in a small number of number of GP consultations and more often to HVs in baby clinics. This resulted in eczema necessarily being given limited attention “*it’s often a secondary problem and there’s only time to deal with one problem per consultation*” [GP]. Telephone consultations with GPs were witnessed and patients were observed to consult with pharmacy staff about their eczema. Practitioners mainly viewed eczema as a nuisance condition requiring limited knowledge to treat effectively, “*eczema is simple to treat, nothing much has changed over the years*” [GP] and “*the recipe doesn’t change* [GP]”.

Some GPs described eczema as a “*catch up*” [GP] consultation when clinics were over-running. GPs and nurses noted the absence of specific external incentives for long-term eczema management and that it was a condition without the “*red flags*” [GP] which trigger treatment escalation or referral. They described treatment options as straightforward involving emollients with or without intermittent topical steroids.



Clean copy BMJ Open KM Practitioner mindlines R1 15.3.19 2

1  
2 Few mentioned calcineurin inhibitors or other available medications. Most practitioners considered  
3  
4 emollients to be a homogenous group of preparations all with similar properties, although a few  
5  
6 differentiated in terms of viscosity and texture. Pharmacy staff and HVs were familiar with a broader range  
7  
8 of emollient products and were more likely to offer suggestions for over the counter preparations. This was  
9  
10 in part because no HVs in this study were able to prescribe. GPs were reluctant to prescribe topical steroids  
11  
12 or other treatments unless absolutely necessary. PNs rarely saw patients with atopic eczema.  
13  
14  
15  
16

17  
18 Practitioners recognised that eczema could have a negative impact on wellbeing and quality of life but this  
19  
20 was not often reflected in the care offered. Treatment was mainly in reaction to a flare rather than there  
21  
22 being a long-term plan of care. Generally patients were able to access regular repeat prescriptions for  
23  
24 emollients and practitioners expressed a level of frustration when they presented with a flare having not  
25  
26 requested or used the prescribed treatments. Although 'safety netting' was always in place, planned  
27  
28 follow-up consultations were not suggested. Empathy for patients was most evident in practitioners who  
29  
30 had personal experience of eczema, they articulated a varying level of understanding about the differences  
31  
32 between products, regardless of available empirical evidence, and the extent to which personal preference  
33  
34 influenced concordance. Pharmacy counter staff were the most conversant with the differences between  
35  
36 emollient products having tried samples, and they were most likely to share this knowledge with patients /  
37  
38 customers verbally and in leaflets.  
39  
40  
41  
42  
43

44 Although eczema was viewed as a frequent reason for consultation, it was mainly presented as a secondary  
45  
46 concern and so dealt with swiftly. Eczema was considered simple to treat with little change over time  
47  
48 although practitioners with personal experience of eczema were more aware of the challenges of self-  
49  
50 management and tolerant of personal treatment preferences.  
51  
52  
53  
54

### 55 *Theme 2: Atopic eczema knowledge*

56  
57 Beliefs about eczema influenced the formation of mindlines and for most mindlines were set against a  
58  
59 backdrop of eczema being a low priority condition and a perception of unchanging treatment options which  
60

Clean copy BMJ Open KM Practitioner mindlines R1 15.3.19 2

1  
2 were constrained by local prescribing guidelines (Figure 1). Many practitioners described AE as a common  
3  
4 conditions for which you *“know [treatment] by heart [GP]”* and likened his response to using a  
5  
6 *“satnav .....you stop thinking, the little NHS boxes [on the computer] tell you what to prescribe [GP]”*.  
7  
8

9  
10 Most practitioners reported that their AE knowledge was based on their initial education and recognised  
11  
12 *“pre-reg dermat education was very, very basic” [GP]*. A few had completed dermatology placements during  
13  
14 GP training but reported seeing little AE. One experienced GP recounted learning from a consultant, her  
15  
16 practice was unchanged as she had *“learnt from a consultant many years ago and never heard anything to*  
17  
18 *contradict it” [GP]*. PNs and GPs were aware of available dermatology education but did not attend as it  
19  
20 was a low priority and costly, *“there is training but you have to pay” [PN]* and they preferred to *“avoid reps*  
21  
22 *and sponsored sessions” [GP]*. HVs reported that skin health was never an educational priority.  
23  
24

25  
26 Pharmacist’s knowledge was updated through e-bulletins from different sources and covered only changes  
27  
28 in, and availability of, medications. Only PCS received eczema specific education by attending regular  
29  
30 seasonal sessions provided by their employer. Although deemed to be useful, particularly as they tried  
31  
32 products and were advised on correct application, the educational experience was sometimes suboptimal  
33  
34 as one reported how she was *“shamed into remembering” [PCS]* session content.  
35  
36  
37

38  
39 Local emollient guidelines underpinned many prescribing decisions so practitioners did not need to think as  
40  
41 *“software will fire up a message if another product should be used” [CP]*. Changes to guidelines were  
42  
43 ascribed to cost and *“what was in vogue” [GP]*. Practitioners were not concerned about these changes  
44  
45 stating for example, *“aqueous cream, they’ve gone off that idea for some reason” [PCS]* and *“Zero products*  
46  
47 *are the ones that are currently on trend” [GP trainee]*. Whilst some prescribers stuck rigidly to prescribing  
48  
49 the cheapest product, *“I try to be good and prescribe the cheaper side of things” [GP trainee]*, others were  
50  
51 more flexible according to their own or the patient’s preference. However, deviations from the formulary  
52  
53 were rare on the basis that *“local formulary is very constraining and you’d have to be able to justify why*  
54  
55 *you’d prescribed anything else” [GP]*. Exceptions were observed in the baby clinic and in pharmacy practice  
56  
57  
58 where patients were often informed about a wider range of emollients that could be purchased over the  
59  
60

Clean copy BMJ Open KM Practitioner mindlines R1 15.3.19 2

1  
2 counter. For those who paid a prescription charge this could often be more cost effective. PCS suggested  
3  
4 that they were able to advise patients readily as they had *“tried samples so you can tell the customers what*  
5  
6 *they feel like”* [PCS].  
7

8  
9  
10 Other knowledge sources contributed to eczema mindlines. All staff, with the exception of experienced  
11  
12 GPs, used internet searches most commonly the online resources GP Notebook and Clinical Knowledge  
13  
14 Summaries. Useful websites were often book-marked and visited in preparation for a consultation rather  
15  
16 than alongside the patient. If information was not located almost immediately the practitioner switched to  
17  
18 another website *“we’re hard wired for speed now”* [GP] and *“dipped into what’s relevant”* [GP] as and when  
19  
20 required. None mentioned existing NICE Eczema Guidelines. Local emollient guidelines existed and  
21  
22 influenced the prescribing practice of most practitioners, however others were unaware of these and some  
23  
24 found them hard to access. GPs and HVs used different emollient guidelines and this caused confusion for  
25  
26 patients when they consulted both. A member of pharmacy staff noted the need for *“a synchronised*  
27  
28 *approach so patients don’t get confused”* [PCS]. Practitioners also experienced confusion when offering  
29  
30 advice on treatment application, for example *“treatment is a bit arbitrary – for example should you advise*  
31  
32 *steroid or emollient first?”* [HV].  
33  
34  
35  
36  
37  
38  
39

40 Practitioners learnt from each other to a limited extent, most often within their professional groups. They  
41  
42 recognised *“we learn both good and bad habits from each other”* [PN]. Opportunities for shared learning  
43  
44 had reduced as there was little time to meet up and in-house teaching for GPs and PNs had *“fallen by the*  
45  
46 *wayside”* [GP] due to staff sickness and pressure of work. One GP reported *“phoning a friend”*, now a  
47  
48 consultant dermatologist, when she needed advice. GPs reported learning from trainees during debrief  
49  
50 sessions but could not recall ever having discussed eczema. Trainees exhausted all available information  
51  
52 sources before seeking advice from a GP. HVs and PNs met more frequently and exchanged knowledge  
53  
54 more regularly, although eczema was not a condition of interest.  
55  
56  
57  
58  
59  
60

Clean copy BMJ Open KM Practitioner mindlines R1 15.3.19 2

1  
2 Practitioners expressed varied views on the value of patient knowledge and experience and the extent to  
3  
4 which it influenced care. PNs, HVs and pharmacy staff respectively reported that they routinely *“ask patient*  
5  
6 *what they have tried already”* [PN], *“see what’s worked for them”* [HV] and *“listen and learn from*  
7  
8 *customers”* [PCS] and used this information as a basis for treatment advice. Others listened to patients with  
9  
10 a degree of scepticism but acquiesced to patient preference, *“patients often have fixed ideas [about*  
11  
12 *emollients] and I try to accommodate these”* [GP]. A few were less receptive, for example *“I try to use*  
13  
14 *guidelines and the formulary ..... patient experience stuff can be counterproductive”* [GP trainee] and  
15  
16 others suggested that their wider experience overrode the patients personal preferences and experiences  
17  
18 *“experience wise I’ve found a lot of people get on with it [particular emollient]”* [GP] and therefore that was  
19  
20 what would be prescribed.  
21  
22  
23  
24  
25

26 Only the most experienced practitioners spontaneously articulated the existence of tacit knowledge stating,  
27  
28 *“it’s a perpetual exercise ... adding on knowledge and skills”* [GP] and *“built up knowledge over time”* [PN].  
29  
30 Others pointed to more concrete sources of knowledge. All practitioners understood reliability of evidence  
31  
32 to a greater or lesser extent.  
33  
34  
35

36  
37 Eczema knowledge was constructed from different sources by individual professions. Nursing and medical  
38  
39 staff perceived a limited need to update their knowledge as eczema care was viewed as having changed  
40  
41 little over time. Exceptions to this were practitioners who had personal experience of eczema and  
42  
43 pharmacy staff who regularly updated their mindlines using informal and formal sources of knowledge.  
44  
45  
46

### 47 48 49 *Theme 3: Approaches to self-management*

50  
51 In principle, all practitioners supported self-management of eczema but recognised the difficulties of  
52  
53 achieving this in practice particularly without formal recognition as a long-term condition (LTC). Some  
54  
55 practitioners routinely used techniques to support self-management for patients with other LTCs.  
56  
57 Strategies included for example by *“finding out patients’ expectations”* [PN], *“tailoring knowledge to the*  
58  
59 *person”* [GP], *“start with what the patient understands and then fill in the gaps”* [GP], *“give patients a map*  
60

Clean copy BMJ Open KM Practitioner mindlines R1 15.3.19 2

1  
2 *of management*” [GP], *“instil confidence”* [GP] and *“reinforce that self-management is good”* [GP trainee]. A  
3  
4 few GPs used specific techniques such as *“short bursts of CBT”* [GP], *“motivational interviewing*  
5  
6 *techniques ..... compressed to fit in consultation”* [GP] and *“behaviour modification ..... not a one*  
7  
8 *consultation job”* [GP]. Even practitioners who did not articulate using strategies to support self-  
9  
10 management integrated them in practice for many LTCs. However they were rarely observed or discussed  
11  
12 in relation to eczema.  
13  
14  
15  
16

17  
18 Most eczema care was reactive when patients presented with a flare and talk of eczema care was almost  
19  
20 exclusively about treatment options with virtually no attention paid to ensuring that the patient  
21  
22 understood the condition and actions they could take to avoid the relentless cycle of flares. The most  
23  
24 tangible contribution to self-management was the availability of repeat prescriptions for emollients but  
25  
26 advice to use these consistently was lacking. Barriers to self-management were observed, for example the  
27  
28 appointment system often precluded patients seeing the same GP over time so treatment could be altered  
29  
30 without the benefit of fully understanding the patient journey to date. Contradictory advice given by  
31  
32 practitioners and a lack of faith in patient’s ability to judge when they needed to use topical steroids and to  
33  
34 use them safely presented significant barriers to successful self-management. Practitioners suggested the  
35  
36 *“need to see patients before prescribing [topical] steroids”* [GP], one GP stated that *“sensible”* patients may  
37  
38 get steroids on repeat but struggled to quantify sensible in this context. Pharmacy staff did not recognise  
39  
40 their contribution to self-management per se but recognised the positive impact they had on eczema  
41  
42 management through *“actually taking notice of what they’re telling me”* [PCS] and perceived *“they do trust*  
43  
44 *me ..... I’m well known in the local community”* [PCS] and were therefore easy for customers to  
45  
46  
47  
48  
49 speak with.  
50  
51  
52

53  
54 Whilst recognising the need for self-management the fact that eczema is not categorised as a long-term  
55  
56 condition limited how much patients were supported to self-manage and at times healthcare systems could  
57  
58 hinder attempts.  
59  
60

Clean copy BMJ Open KM Practitioner mindlines R1 15.3.19 2

## Discussion

This study offers new insights into how primary care practitioners construct atopic eczema specific mindlines. Practitioner mindlines are predominantly set against a back drop of eczema being a low priority, due to a combination of not being viewed as an LTC and so lacking external incentives and the perception of available treatments being standard use of emollients and topical steroids, which changes little over time and is constrained by prescribing guidance. This led to an assumption that there was little need to amend mindlines. Eczema mindlines were developed early in their career by many practitioners and were relatively static amongst GPs, PNs and HVs, except for those with direct personal experience of eczema. Mindlines of pharmacy staff were regularly modified through a combination of education provided by their employer, electronic updates from professional bodies and interactions with customers. The latter was particularly influential for the PCSs as they generally had more time to listen and had built up trusting relationship with the customers over time.

This study is one of few to apply mindline theory to a specific condition across a broad range of practitioners. In particular it identifies important differences in the way in which eczema mindlines are developed and so may best be amended for individual practitioner groups. This study conforms with conventions of robust qualitative work in that it is rigorous (coherent and sufficiently well reported to be open to external audit), relevant (enriches understanding of the subject), resonant (resonates with readers experiences and understandings) and reflexive (subjectivity of the author is acknowledged) (44). Limitations include issues of reliability as the ethnographer is a lone worker and data analysis was completed by the researcher alone, however this is mitigated by conversations with participants to check understandings. As data was collected in one general practice, findings may not be transferable but the diversity of participants should minimise this risk (45). Additionally no nurse practitioners were included as, at the time of data collection, none were employed in the practice.

As with the original conceptualisation of Gabbay and leMay (30), practitioner eczema mindlines are composed over time, from a range of evidence sources which rarely embrace direct use of research.

Clean copy BMJ Open KM Practitioner mindlines R1 15.3.19 2

1  
2 Gabbay and le May (28) point to the critical nature of knowledge-in-practice-in-context in which in each  
3  
4 context new knowledge is converted by the complex social processes of the Socialization, Externalization,  
5  
6 Combination, Internalization spiral (32). Context was central in the formation of eczema mindlines but was  
7  
8 informed more by long-held beliefs and national policy than by local context. Key differences in this study  
9  
10 are that mindline development has evolved alongside the changing nature of primary care where  
11  
12 practitioners, particularly GPs, appear to work more in isolation than as part of a community with “coffee  
13  
14 room chat” (46) appearing much reduced. In parallel available online resources have spiralled thus  
15  
16 potentially reducing the need to confer with others. This challenges the notion that mindlines are heavily  
17  
18 reliant on professional interactions (28). The static nature of eczema mindlines and the beliefs  
19  
20 underpinning eczema care meant that they were accessed using fast, automatic, System 1 thinking rather  
21  
22 than the more deliberative, conscious slow and effortful System 2 approach (47).  
23  
24  
25  
26  
27

28  
29 Few studies have investigated condition specific mindlines with the exception of a Tanzanian study of  
30  
31 malaria diagnosis (48), however the depiction here is more akin to rules of thumb or heuristics. A  
32  
33 comprehensive commentary on mindlines identifies 76 papers categorised as “in practice”, that is studies  
34  
35 of how mindlines are developed, many of these used the term to mean consulting with colleagues (33). A  
36  
37 smaller number were faithful to the original Gabbay and Le May’s conceptualisation but add little by way of  
38  
39 new understanding. More recently Wieringa and colleagues (49) investigated mindlines development in  
40  
41 online clinical communities concluding that they offered collective, dynamic settings and implicitly that  
42  
43 they may be areas for mindline amendment. Whilst online communities may appeal to some practitioners,  
44  
45 this will not be so for all.  
46  
47  
48  
49

50  
51 In this study eczema was consider low priority. These beliefs are longstanding with surveys suggesting that  
52  
53 both patients and practitioners perceive dermatology as a poor relation in healthcare (50-52) and Magin  
54  
55 and colleagues (4) describing ‘dismissive’ and ‘unsympathetic’ attitudes amongst GPs. Eczema appears to  
56  
57 be considered as “health problem which is not an illness” (53) and therefore less legitimate and worthy  
58  
59 than other conditions. Ambivalence about eczema specific learning was in contrast to a survey which  
60

Clean copy BMJ Open KM Practitioner mindlines R1 15.3.19 2

1  
2 indicated a desire for new knowledge, particularly in the form of education delivered by consultants (54);  
3  
4 inevitably GPs completing the survey would be those with an interest in dermatology. The dermatology  
5  
6 community has used many strategies to make research findings accessible to all with limited success (55).  
7  
8 In contrast with this study in which treatment for eczema was viewed as simple others report GPs  
9  
10 uncertainty about managing eczema (56).  
11  
12  
13  
14

15 Achieving change in primary care practice is challenging, interventions most likely to influence practice  
16  
17 demonstrate evidence of benefit, are simple to use and adaptable to local context (57). The context of  
18  
19 eczema mindlines, that it is a low priority condition with a limited repertoire of treatment options, is  
20  
21 unlikely to change in the foreseeable future. If, like other LTCs eczema was recognised in the Quality and  
22  
23 Outcomes Framework (58) patients may benefit from the accelerated trends towards systematic  
24  
25 management (59). Practitioners in primary care are expert generalists (60) and are expected to have  
26  
27 knowledge of many conditions for which there is wealth of available evidence. This may lead to information  
28  
29 overload for which coping strategies are needed. Bate and colleagues (61) describe “satisficing” that is,  
30  
31 curtailing the amount of information gathered to enable them to make a “good enough” decision.  
32  
33  
34  
35  
36  
37

38 In many ways it can be argued that treatment of eczema in primary care is relatively straightforward and  
39  
40 that amendment of mindlines to adjust thinking about emollients and removal of outdated information  
41  
42 about topical steroid use could make a significant change in practice that would improve both patient  
43  
44 experience and self-management practices. Brevity and accessibility of information is key as practitioners  
45  
46 have been found to judge the usefulness of new knowledge as function of its relevance x validity ÷ by the  
47  
48 work needed to access it (62). It is possible that straightforward messages could be conveyed through  
49  
50 media such as aphorisms, “succinct sayings that offer advice” (63) or actionable nuggets “knowledge  
51  
52 translation tools designed to provide ..... concise practical information about the most prevalent and  
53  
54 pressing primary care needs of patients” (64). This approach offers the opportunity to compensate for the  
55  
56 loss of professional wisdom through personal communication by transmitting concentrated wisdom and  
57  
58 guidance in a different way (63).  
59  
60



Clean copy BMJ Open KM Practitioner mindlines R1 15.3.19 2

Efforts to amend GPs, PNs and HVs mindlines need to be accessible via rapid System 1 thinking.

Interventions should be specific, practical, tailored, relevant and rapidly delivered information which can readily be assimilated, or as participants in this study described it, a “no faff” approach. Given their time constraints and information gathering habits any new information would best be delivered individually rather than in a group setting and available online and possibly in other formats.

The role of the community pharmacist in eczema care is evolving partly in response to Pharmaceutical Services Negotiating Committee guidance on Medicines Use Reviews (65), New Medicine Service (66) and Minor Ailment Service (67). Forthcoming changes in availability of emollients on prescription may increase their role further. Pharmacy staff described eczema mindline development as a more collective experience than other practitioners and valued learning from each other and from customers. They may be open to group approaches to update and remove redundant information from their mindlines and this would need to be brokered through both professional and employing organisations.

## Conclusion

This ethnographic study provides new understandings about the development of atopic eczema specific mindlines in different practitioner groups in primary care. The outstanding challenge is to find novel, context-specific, simple, pragmatic strategies to revise or modify these mindlines by adding reliable and useful knowledge and by erasing outdated or inaccurate information using strategies that are most appropriate to each profession. Mindline amendment has the potential to improve self-management and quality of eczema care through the delivery of consistent, evidence-based care.

Clean copy BMJ Open KM Practitioner mindlines R1 15.3.19 2

### **Contribution statement**

FC is the sole contributor to this paper

### **Funding**

This report is independent research arising from a Knowledge Mobilisation Research Fellowship, Professor Fiona Cowdell, KMRF-2015-04-004 supported by the National Institute for Health Research. The views expressed in this publication are those of the authors and not necessarily those of the NHS, the National Institute for Health Research, Health Education England or the Department of Health.

### **Ethical approval**

The study was approved by a National Health Service REC (16/YH/0252). Process consent was used for observation, on each occasion informal conversations were used to re-check participant's willingness to be observed. Patients were informed about the study by practitioners and when necessary the researcher exited individual consultations, either at the request of the patient, the practitioner or using personal judgment, although this was infrequently needed. Written consent was taken for audio-recorded interviews. Interview participants consented to publication of anonymised information.

### **Competing interests**

None to declare

### **Acknowledgements**

Thanks to Amanda Roberts who have given invaluable lay feedback on the planning and design of this study. Thanks to James Mycock, Birmingham City University for the mindline illustration and to Professors Hywel William and Stephen Timmons, University of Nottingham for their valuable feedback on earlier iterations of this manuscript

### **Data sharing statement**

The datasets generated and/or analysed during the current study are not publicly available as they are not designed to be re-analysed by others but are available from the corresponding author on reasonable request.

Clean copy BMJ Open KM Practitioner mindlines R1 15.3.19 2

## References

1. Hay RJ, Johns NE, Williams HC, et al. The global burden of skin disease in 2010: an analysis of the prevalence and impact of skin conditions. *J Invest Dermatol.* 2014; 134: 1527-1534.
2. Schofield J, Grindlay D, Williams H, Skin conditions in the UK: a health care needs assessment. Centre of Evidence Based Dermatology, University of Nottingham; 2009.
3. Cowdell F. Knowledge mobilisation: an ethnographic study of the influence of lay mindlines on eczema self-management in primary care in the United Kingdom. *BMJ Open.* In press
4. Magin P, Adams J, Heading G, Pond C. Patients with skin disease and their relationships with their doctors: a qualitative study of patients with acne, psoriasis and eczema. *Med J Aust.* 2009; 190:62-64
5. Santer M, Burgess H, Yardley L, et al. Experiences of carers managing childhood eczema and their views on its treatment: A qualitative study. *Br J Gen Pract.* 2012; 62:261-267.
6. Powell K, Le Roux E, Banks J, et al. GP and parent dissonance about the assessment and treatment of childhood eczema in primary care: a qualitative study. *BMJ Open.* 2018; 8:e019633.
7. Rüksam M, Esch M, Baum E, et al. Diagnosing skin disease in primary care: A qualitative study of GPs' approaches. *Fam Pract.* 2015; 32: 591-595.
8. Nicol NH, Ersser SJ. The role of the nurse educator in managing atopic dermatitis. *Immunol Allergy Clin.* 2010; 30:369-383.
9. Rolinck-Werninghaus C, Trentmann M, Reich A, et al. Improved management of childhood atopic dermatitis after individually tailored nurse consultations: a pilot study. *Pediat Allergy Immunol.* 2015; 26: 805-810.
10. Tucker R, Stewart D. Why people seek advice from community pharmacies about skin problems. *Int J Pharm Pract.* 2015; 23(2): 150-153.
11. Tucker RP, MacLure K, Paudyal V, et al. An exploratory study of community pharmacist diagnosis and management of dermatitis and acne. *Selfcare J.* 2017; 8(2):1-10
12. Tucker R. The medicines use review in patients with chronic skin diseases: are pharmacists doing them and how confident are they? *Int J Pharm Pract.* 2013; 21:202-204.
13. Banks J, Shaw A, Weiss MC. The community pharmacy and discursive complexity: a qualitative study of interaction between counter assistants and customers. *Health Soc Care Community.* 2007; 15:313-321.
14. Santer M, Burgess H, Yardley L, et al. Managing childhood eczema: Qualitative study exploring carers' experiences of barriers and facilitators to treatment adherence. *J Adv Nurs.* 2013; 69:2493-2501.
15. Teasdale EJ, Muller I, Santer M. 2017. Carers' views of topical corticosteroid use in childhood eczema: a qualitative study of online discussion forums. *Br J Dermatol.* 2017; 176(6):1500-1507.
16. Global Resource for Eczema Trials (GREAT) database <http://www.greatdatabase.org.uk/GD4/Home/Index.php> Accessed 4.7.18
17. National Institute for Health and Care Excellence. Atopic eczema in under 12s: diagnosis and management. Clinical guideline [CG57] 2007 <https://www.nice.org.uk/Guidance/CG57>. Accessed 4.7.18
18. Powell K, Le Roux E, Banks JP, et al. Developing a written action plan for children with eczema: A qualitative study. *Brit J Gen Pract.* 2018; 68(667):e81-e89.
19. Department of Health 2014 The Mandate: A mandate from the Government to NHS England: April 2014 – March 2015 [https://www.gov.uk/government/uploads/system/uploads/attachment\\_data/file/383495/2902896\\_DoH\\_Mandate\\_Accessible\\_v0.2.pdf](https://www.gov.uk/government/uploads/system/uploads/attachment_data/file/383495/2902896_DoH_Mandate_Accessible_v0.2.pdf) Accessed 4.7.18
20. Ridd MJ, King AJL, Le Roux E, et al. Systematic review of self-management interventions for people with eczema. *Br J Dermatol.* 2017; 177(3):719-734.
21. Hanlon P, Daines L, Campbell C. et al. Telehealth interventions to support self-management of long-term conditions: a systematic metareview of diabetes, heart failure, asthma, chronic obstructive pulmonary disease, and cancer. *JMIR.* 2017; 19:e172.

Clean copy BMJ Open KM Practitioner mindlines R1 15.3.19 2

22. Sackett, DL, Rosenberg WM, Gray JM, et al. Evidence based medicine: what it is and what it isn't. *BMJ*. 1996; 312:71-2.
23. Greenhalgh T, Howick J, Maskrey N. "Evidence based medicine: a movement in crisis?" *BMJ* 348 (2014): g3725.
24. Brownson RC, Colditz GA, Proctor EK. eds. *Dissemination and implementation research in health: translating science to practice*. Oxford: Oxford University Press; 2017.
25. Vaucher C, Bovet E, Bengough T, et al. Meeting physicians' needs: a bottom-up approach for improving the implementation of medical knowledge into practice. *Health Res Policy Syst*. 2016; 14:49.
26. Ward V. 2017. Why, whose, what and how? A framework for knowledge mobilisers. *Evid Policy*. 2017; 13:477-497.
27. Ferlie E, Crilly T, Jashapara A, et al. Knowledge mobilisation in healthcare: a critical review of health sector and generic management literature. *Soc Sci Med*. 2012;74:1297-1304.
28. Gabbay J, Le May A. *Practice-based evidence for healthcare: clinical mindlines*. London: Routledge; 2010.
29. Plamondon K, Caxaj S. 2018. Toward Relational Practices for Enabling Knowledge-to-action in Health Systems: The Example of Deliberative Dialogue. *Adv Nurs Sci*. 2018; 41:18-29.
30. Gabbay J, le May A. Evidence based guidelines or collectively constructed "mindlines?" *Ethnographic study of knowledge management in primary care*. *BMJ*. 2004; 329:1013.
31. Polanyi M. The logic of tacit inference. *Philos*.1966; 41:1-18.
32. Nonaka I, Takeuchi H. *The knowledge-creating company: How Japanese companies create the dynamics of innovation*. Oxford: Oxford University Press; 1995.
33. Wieringa S, Greenhalgh T. 10 years of mindlines: a systematic review and commentary. *Imp Sci*. 2015; 10:45.
34. Hammersley M, Atkinson P. *Ethnography: Principles in Practice*. Abingdon: Routledge;2007.
35. Spradley JP. *Participant observation*. Illinois: Waveland Press; 2016.
36. Spradley JP. *The ethnographic interview*. Illinois: Waveland Press; 2016.
37. Cowdell F. *That's how we do it we treat them all the same: An exploration of the experiences of patients, lay carers and health and social care staff of the care of people with dementia in acute hospital settings*. Cambridge. Cambridge Publishing. 2013.
38. Tongco MD. Purposive sampling as a tool for informant selection. *Ethnobotany Research and Applications*. 2007. 31; 5:147-58.
39. O'Reilly M, Parker N. 'Unsatisfactory Saturation': a critical exploration of the notion of saturated sample sizes in qualitative research. *Qual Res*. 2013; 13:190-197.
40. Clinical Knowledge Summaries. Eczema – atopic <https://cks.nice.org.uk/eczema-atopic> Accessed 4.7.18
41. GP Notebook. Eczema <http://www.gpnotebook.co.uk/simplepage.cfm?ID=623902719> Accessed 4.7.18
42. Polkinghorne DE. Language and meaning: Data collection in qualitative research. *J Couns Psychol*, 2005; 52(2):137.
43. Matua GA, Van Der Wal DM. Differentiating between descriptive and interpretive phenomenological research approaches. *Nur Res*. 2015; 22(6):22.
44. Finlay L. *Phenomenology for psychotherapists: Researching the lived world*. Oxford: Wiley Blackwell; 2011.
45. University of Hertfordshire 2017 Disadvantages of Ethnographic Research [http://www.health.herts.ac.uk/immunology/Web%20programme%20-%20Researchhealthprofessionals/disadvantages\\_associated\\_with\\_et.htm](http://www.health.herts.ac.uk/immunology/Web%20programme%20-%20Researchhealthprofessionals/disadvantages_associated_with_et.htm). Accessed 4.7.18
46. Gabbay J, le May. Mindlines: making sense of evidence in practice. *B J Gen Pract*. 2016: 402-403.
47. Kahneman D. *Thinking, Fast and Slow*. London: Penguin; 2011.
48. Chandler CI, Jones C, Boniface G et al. Guidelines and mindlines: why do clinical staff over-dignose malaria in Tanzania? A qualitative study. *Malar J* 2008;7:53
49. Wieringa S, Engebretsen E, Heggen K, et al. How knowledge is constructed and exchanged in virtual communities of physicians: qualitative study of mindlines online. *JMIR*. 2018;20: e34.

Clean copy BMJ Open KM Practitioner mindlines R1 15.3.19 2

- 1
- 2
- 3 50. Rosoff SM, Leone MC. (1989). The prestige of dermatologists. are they "last among equals"? *Int J Dermatol.* 1989; 28:377-380.
- 4
- 5 51. Rosoff SM, Leone MC (1991). The public prestige of medical specialties: Overviews and
- 6 undercurrents. *Soc Sci Med.* 1991;32:321-326.
- 7
- 8 52. Creed PA, Searle J, Rogers ME. Medical specialty prestige and lifestyle preferences for medical
- 9 students. *Soc Sci Med.* 2010;71:1084-8.
- 10
- 11 53. Cornwell J. *Hard-earned lives: accounts of health and illness from East London*:Routledge Kegan &
- 12 Paul;1984.
- 13
- 14 54. Soriano LF, Sahota A, Jolliffe V. An evaluation of general practitioners learning preferences in
- 15 dermatology. *Education for Primary Care.* 2017; 17:1-2.
- 16
- 17 55. Baron SE, Cohen SN, Archer CB. Guidance on the diagnosis and clinical management of atopic
- 18 eczema. *Clin Exp Dermatol.* 2012; 37:Suppl 1, 7-12.
- 19
- 20 56. Le Roux, E, Powell K, Banks JP, et al. GPs' experiences of diagnosing and managing childhood
- 21 eczema: a qualitative study in primary care. *Br J Gen Pract.* 2018. Feb 16:bjgp18X694529.
- 22
- 23 57. Lau R, Stevenson F, Ong BN, et al. Achieving change in primary care—causes of the evidence to
- 24 practice gap: systematic reviews of reviews. *Imp Sci.* 2015;11:40.
- 25
- 26 58. National Institute for Health and Care Excellence (2018) NICE Quality and Outcomes Framework
- 27 indicator <https://www.nice.org.uk/standards-and-indicators/qofindicators> Accessed 4.7.18
- 28
- 29 59. Roland M, Guthrie B. Quality and Outcomes Framework: what have we learnt? *BMJ* 2016;354:i4060
- 30
- 31 60. Reeve J, Dowrick CF, Freeman GK, et al. Examining the practice of generalist expertise: a qualitative
- 32 study identifying constraints and solutions. *JRSM short reports.* 2013; 4(12):2042533313510155.
- 33
- 34 61. Bate L, Hutchinson A, Underhill J, et al. How clinical decisions are made. *Br J Clin Pharmacol.* 2012;
- 35 74:614-20.
- 36
- 37 62. Cunningham M, Shirley A. Mindlines in a digital age. *Education for Primary Care.* 2015; 26:293-6.
- 38
- 39 63. Levine D, Bleakley A. Maximising medicine through aphorisms. *Med Educ.* 2012; 46:153-162
- 40
- 41 64. McColl MA, Aiken A, Smith K, et al. Actionable nuggets: knowledge translation tool for the needs of
- 42 patients with spinal cord injury. *Can Fam Physician.* 2015; 61:e240-e248.
- 43
- 44 65. Pharmaceutical Services Negotiating Committee Medicines Use Review [http://psnc.org.uk/services-](http://psnc.org.uk/services-commissioning/advanced-services/murs/)
- 45 [commissioning/advanced-services/murs/](http://psnc.org.uk/services-commissioning/advanced-services/murs/) Accessed 4.7.18
- 46
- 47 66. Pharmaceutical Services Negotiating Committee New Medicine Service [http://psnc.org.uk/services-](http://psnc.org.uk/services-commissioning/advanced-services/nms/)
- 48 [commissioning/advanced-services/nms/](http://psnc.org.uk/services-commissioning/advanced-services/nms/) Accessed 4.7.18
- 49
- 50 67. Pharmaceutical Services Negotiating Committee Minor Ailment Service
- 51 [http://psnc.org.uk/services-commissioning/locally-commissioned-services/en8-minor-ailments-](http://psnc.org.uk/services-commissioning/locally-commissioned-services/en8-minor-ailments-service/)
- 52 [service/](http://psnc.org.uk/services-commissioning/locally-commissioned-services/en8-minor-ailments-service/) Accessed 4.7.18
- 53
- 54
- 55
- 56
- 57
- 58
- 59
- 60

Clean copy BMJ Open KM Practitioner mindlines R1 15.3.19 2

**Table 1:** Practitioner interview topic guide

**Table 2:** Demographic details of participants

**Table 3:** Complete dataset

**Table 4:** Example of data analysis process

**Figure 1:** Practitioner eczema mindlines

Sources of information underpinning practitioner eczema mindlines.

For peer review only

1  
2  
3  
4  
5  
6  
7  
8  
9  
10  
11  
12  
13  
14  
15  
16  
17  
18  
19  
20  
21  
22  
23  
24  
25  
26  
27  
28  
29  
30  
31  
32  
33  
34  
35  
36  
37  
38  
39  
40  
41  
42  
43  
44  
45  
46  
47  
48  
49  
50  
51  
52  
53  
54  
55  
56  
57  
58  
59  
60

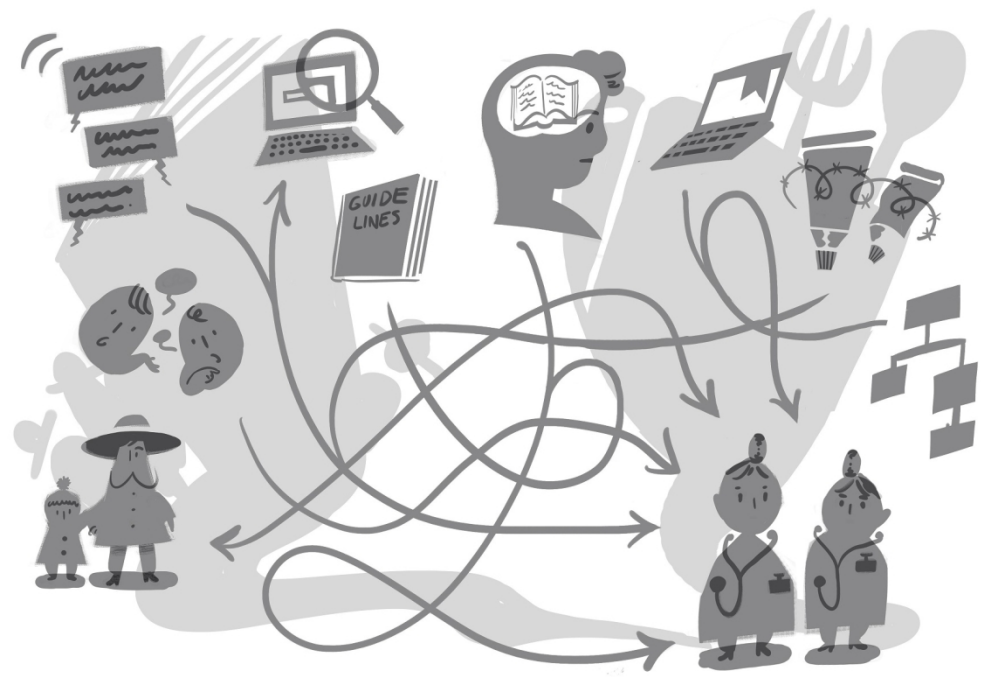

Practitioner eczema mindline  
371x262mm (120 x 120 DPI)



## BMJ Open Practitioner eczema mindlines COREQ 4.7.18

## COREQ Statement

Knowledge mobilisation: An ethnographic study of the influence of practitioner mindlines on eczema self-management in primary care in the United Kingdom

| Statement                                                                                                                                                                                                                                                                                                                                                                                                                                                        | Page no    |
|------------------------------------------------------------------------------------------------------------------------------------------------------------------------------------------------------------------------------------------------------------------------------------------------------------------------------------------------------------------------------------------------------------------------------------------------------------------|------------|
| <b>Domain 1: Research team and reflexivity</b>                                                                                                                                                                                                                                                                                                                                                                                                                   |            |
| <i>Personal Characteristics</i>                                                                                                                                                                                                                                                                                                                                                                                                                                  |            |
| 1. Interviewer/facilitator Which author/s conducted the interview or focus group?<br>I conducted all observation and interviews                                                                                                                                                                                                                                                                                                                                  | 6          |
| 2. Credentials What were the researcher's credentials? E.g. PhD, MD<br>DProf, RN                                                                                                                                                                                                                                                                                                                                                                                 | Title page |
| 3. Occupation What was their occupation at the time of the study?<br>Professor of Nursing and Health Research                                                                                                                                                                                                                                                                                                                                                    | Title page |
| 4. Gender Was the researcher male or female?<br>Female                                                                                                                                                                                                                                                                                                                                                                                                           | Title page |
| 5. Experience and training What experience or training did the researcher have?<br>I have extensive experience in qualitative research.                                                                                                                                                                                                                                                                                                                          | Title page |
| <i>Relationship with participants</i>                                                                                                                                                                                                                                                                                                                                                                                                                            |            |
| 6. Relationship established Was a relationship established prior to study commencement?<br>I established rapport with each observational participant at each meeting and with interviewees at the time of interview.                                                                                                                                                                                                                                             | 6          |
| 7. Participant knowledge of the interviewer<br>What did the participants know about the researcher? e.g. personal goals, reasons for doing the research<br>I met the team prior to observation, provided an information sheet, explained about myself and the study and answered questions. I gave interview participants an information sheet prior to interviews and answered any questions, I reiterated this information at the beginning of each interview. | 6          |
| 8. Interviewer characteristics What characteristics were reported about the interviewer/facilitator? e.g. Bias, assumptions, reasons and interests in the research topic<br>Participants were aware, and it is reported in the manuscript, that I am a Registered Nurse with an interest in how eczema knowledge is developed and shared between patients and practitioners in primary care and that this was a publically funded study.                         | 8          |
| <b>Domain 2: study design</b>                                                                                                                                                                                                                                                                                                                                                                                                                                    | 5          |
| <i>Theoretical framework</i>                                                                                                                                                                                                                                                                                                                                                                                                                                     |            |
| 9. Methodological orientation and theory<br>What methodological orientation was stated to underpin the study? e.g. grounded theory, discourse analysis, ethnography, phenomenology, content analysis<br>In the methods section I explain that this is an ethnographic study using observation and interviews and that data analysis followed an ethnographic approach through the lenses of mindlines and self-management.                                       |            |
| Participant selection                                                                                                                                                                                                                                                                                                                                                                                                                                            | 6          |
| 10. Sampling How were participants selected? e.g. purposive, convenience, consecutive, snowball<br>I collected observational data during 250 hours in the practice. I selected interview participants using maximum variation purposive sampling to ensure a mix of profession, gender and years in practice.                                                                                                                                                    |            |
| 11. Method of approach How were participants approached? e.g. face-to-face, telephone, mail, email<br>Observation participants were recruited at the beginning of each encounter with the practice. I recruited interview participants from the practice and local pharmacy.                                                                                                                                                                                     | 6          |
| 12. Sample size How many participants were in the study?<br>Observation involved many participants and 16 interviews were completed                                                                                                                                                                                                                                                                                                                              | 6          |
| 13. Non-participation How many people refused to participate or dropped out? Reasons?<br>On occasion I exited consultations at the request of the patient, practitioner or of my own volition<br>A few practitioners declined to take part in interviews due to time constraints.                                                                                                                                                                                | 5          |
| <i>Setting</i>                                                                                                                                                                                                                                                                                                                                                                                                                                                   |            |
| 14. Setting of data collection Where was the data collected? e.g. home, clinic, workplace<br>Observational data was collected in a GP practice. Interviews were conducted in their workplace.                                                                                                                                                                                                                                                                    | 6          |
| 15. Presence of non-participants Was anyone else present besides the participants and researchers?                                                                                                                                                                                                                                                                                                                                                               | 6          |



## BMJ Open Practitioner eczema mindlines COREQ 4.7.18

|    |                                                                                                                                                            |         |
|----|------------------------------------------------------------------------------------------------------------------------------------------------------------|---------|
| 1  | Observational data involved numerous individuals. Interviews were conducted individually.                                                                  |         |
| 2  | 16. Description of sample What are the important characteristics of the sample? e.g. demographic data, date                                                | Table 2 |
| 3  | Interview participants were sampled by profession, gender and years in practice.                                                                           |         |
| 4  | <i>Data collection</i>                                                                                                                                     | Table 1 |
| 5  | 17. Interview guide Were questions, prompts, guides provided by the authors? Was it pilot tested?                                                          |         |
| 6  | A topic guide was used for interviews                                                                                                                      |         |
| 7  | 18. Repeat interviews Were repeat interviews carried out? If yes, how many?                                                                                | NA      |
| 8  | No repeat interviews were carried out                                                                                                                      |         |
| 9  | 19. Audio/visual recording Did the research use audio or visual recording to collect the data?                                                             | 6       |
| 10 | Interviews were audio recorded and observational data recorded in field notes                                                                              |         |
| 11 | 20. Field notes Were field notes made during and/or after the interview or focus group?                                                                    | 6       |
| 12 | 21. Duration What was the duration of the interviews or focus group?                                                                                       | 6       |
| 13 | Interviews lasted from 22-40 minutes                                                                                                                       |         |
| 14 | 22. Data saturation Was data saturation discussed?                                                                                                         | 8       |
| 15 | Data sufficiency was achieved when no new sources of knowledge were identified in interviews.                                                              |         |
| 16 | 23. Transcripts returned Were transcripts returned to participants for comment and/or correction?                                                          | NA      |
| 17 | No                                                                                                                                                         |         |
| 18 | <b>Domain 3: analysis and findings</b>                                                                                                                     | 8       |
| 19 | <i>Data analysis</i>                                                                                                                                       |         |
| 20 | 24. Number of data coders How many data coders coded the data?                                                                                             |         |
| 21 | I analysed the data independently and subsequently discussed with research, clinical and lay colleagues who corroborated initial interpretations.          |         |
| 22 | 25. Description of the coding tree Did authors provide a description of the coding tree?                                                                   | NA      |
| 23 | No                                                                                                                                                         |         |
| 24 | 26. Derivation of themes Were themes identified in advance or derived from the data?                                                                       | 8       |
| 25 | Themes were derived inductively from the data                                                                                                              |         |
| 26 | 27. Software What software, if applicable, was used to manage the data?                                                                                    | NA      |
| 27 | No                                                                                                                                                         |         |
| 28 | 28. Participant checking Did participants provide feedback on the findings?                                                                                | NA      |
| 29 | No                                                                                                                                                         |         |
| 30 | <i>Reporting</i>                                                                                                                                           | 9 - 14  |
| 31 | 29. Quotations presented Were participant quotations presented to illustrate the themes / findings? Was each quotation identified? e.g. participant number |         |
| 32 | Quotations are provided and profession of participant is identified.                                                                                       |         |
| 33 | 30. Data and findings consistent Was there consistency between the data presented and the findings?                                                        | 9 - 14  |
| 34 | Yes.                                                                                                                                                       |         |
| 35 | 31. Clarity of major themes Were major themes clearly presented in the findings?                                                                           | 9 - 14  |
| 36 | Yes.                                                                                                                                                       |         |
| 37 | 32. Clarity of minor themes Is there a description of diverse cases or discussion of minor themes?                                                         | 9 - 14  |
| 38 | Yes, I present a spectrum of practitioners and variations of mindlines.                                                                                    |         |
| 39 |                                                                                                                                                            |         |
| 40 |                                                                                                                                                            |         |
| 41 |                                                                                                                                                            |         |
| 42 |                                                                                                                                                            |         |
| 43 |                                                                                                                                                            |         |
| 44 |                                                                                                                                                            |         |
| 45 |                                                                                                                                                            |         |
| 46 |                                                                                                                                                            |         |
| 47 |                                                                                                                                                            |         |
| 48 |                                                                                                                                                            |         |
| 49 |                                                                                                                                                            |         |
| 50 |                                                                                                                                                            |         |
| 51 |                                                                                                                                                            |         |
| 52 |                                                                                                                                                            |         |
| 53 |                                                                                                                                                            |         |
| 54 |                                                                                                                                                            |         |
| 55 |                                                                                                                                                            |         |
| 56 |                                                                                                                                                            |         |
| 57 |                                                                                                                                                            |         |
| 58 |                                                                                                                                                            |         |
| 59 |                                                                                                                                                            |         |
| 60 |                                                                                                                                                            |         |

# BMJ Open

## Knowledge mobilisation: An ethnographic study of the influence of practitioner mindlines on atopic eczema self-management in primary care in the United Kingdom

|                                 |                                                                                                             |
|---------------------------------|-------------------------------------------------------------------------------------------------------------|
| Journal:                        | <i>BMJ Open</i>                                                                                             |
| Manuscript ID                   | bmjopen-2018-025220.R2                                                                                      |
| Article Type:                   | Research                                                                                                    |
| Date Submitted by the Author:   | 24-May-2019                                                                                                 |
| Complete List of Authors:       | Cowdell, Fiona; Birmingham City University, Faculty of Health Education and Life Sciences                   |
| <b>Primary Subject Heading</b>: | Dermatology                                                                                                 |
| Secondary Subject Heading:      | Evidence based practice, General practice / Family practice, Health services research, Qualitative research |
| Keywords:                       | Ethnography, Knowledge mobilisation, Mindlines, PRIMARY CARE, Self-management, Atopic eczema                |
|                                 |                                                                                                             |

SCHOLARONE™  
Manuscripts

1 Marked copy BMJ Open KM Practitioner mindlines R2 24.5.19  
2  
3

4 **Article title:** Knowledge mobilisation: An ethnographic study of the influence of practitioner mindlines on  
5 atopic eczema self-management in primary care in the United Kingdom  
6

7 **Author information:**

8 Fiona Cowdell  
9 DProf, RN  
10 Professor of Nursing and Health Research  
11 Faculty of Health, Education and Life Sciences  
12 Birmingham City University  
13 220 Ravensbury House  
14 Westbourne Road  
15 Edgbaston  
16 Birmingham  
17 B15 3TN  
18 UK  
19 Telephone: +44 (0)121 300 4345  
20 Email: [Fiona.cowdell@bcu.ac.uk](mailto:Fiona.cowdell@bcu.ac.uk)  
21 [orcid.org/0000-0002-9355-8059](https://orcid.org/0000-0002-9355-8059)  
22  
23  
24

25 **Word count:** 5324

26 **Number of figures and tables:** one figure and four tables

27  
28 **Keywords:** atopic eczema, ethnography, knowledge mobilisation, mindlines, primary care, self-  
29 management  
30  
31  
32  
33  
34  
35  
36  
37  
38  
39  
40  
41  
42  
43  
44  
45  
46  
47  
48  
49  
50  
51  
52  
53  
54  
55  
56  
57  
58  
59  
60

1  
2  
3  
4  
5  
6  
7  
8  
9  
10  
11  
12  
13  
14  
15  
16  
17  
18  
19  
20  
21  
22  
23  
24  
25  
26  
27  
28  
29  
30  
31  
32  
33  
34  
35  
36  
37  
38  
39  
40  
41  
42  
43  
44  
45  
46  
47  
48  
49  
50  
51  
52  
53  
54  
55  
56  
57  
58  
59  
60

Marked copy BMJ Open KM Practitioner mindlines R2 24.5.19

## **Knowledge mobilisation: an ethnographic study of the influence of practitioner mindlines on atopic eczema self-management in primary care in the United Kingdom**

### **Abstract**

**Objective:** To explore how atopic eczema specific mindlines are developed by primary care practitioners.

**Design:** Ethnographic study.

**Setting:** One large, urban general practice in central England.

**Participants:** In observation, all practitioners and support staff in the practice and in interviews a diverse group of practitioners (n=16).

**Results:** Observation of over 250 hours and interview data were combined and analysed using an ethnographic approach through the lenses of mindlines and self-management. Three themes were identified: beliefs about eczema, eczema knowledge and approaches to self-management. Eczema mindlines are set against a backdrop of it being a low priority and not managed as a long-term condition. Practitioners believed that eczema is a simple to manage with little change in treatments available and prescribing limited by local formularies. Practice is largely based on tacit knowledge and experience. Self-management is expected but not often explicitly facilitated. Clinical decisions are made from knowledge accumulated over time. Societal and technological developments have altered the way in which practitioner mindlines are developed; in eczema, for most, they are relatively static.

**Conclusions:** The outstanding challenge is to find novel, profession and context-specific, simple, pragmatic strategies to revise or modify practitioner mindlines by adding reliable and useful knowledge and by erasing outdated or inaccurate information thus potentially improve quality of eczema care.

### **Strengths and limitations**

- First ethnographic study to examine the development of atopic eczema specific mindlines
- Diverse sample primary care practitioners
- Ethnographer was a lone researcher
- Results may be context specific

Marked copy BMJ Open KM Practitioner mindlines R2 24.5.19

## Introduction

Atopic eczema (hereafter “eczema”) is a common, long-term skin condition affecting around one in five children and one in twelve adults in the United Kingdom (UK). It can have a detrimental impact on wellbeing and quality of life and globally is one of the fifty most burdensome diseases (1). Eczema is mainly treated in primary care (2). People may seek advice from general practitioners (GPs), practice nurses (PNs), nurse practitioners (NPs), health visitors (HVs), community pharmacists (CP) and pharmacy counter staff (PCS).

GP consultations are often unsatisfactory for both patient (3) and practitioner (4, 5) with GPs dominating encounters and using avoidance tactics (6) and there being significant dissonance between patient / parent and GP beliefs about assessment and treatment (6). Many GPs have limited specialist dermatology knowledge (7). Nurse consultations, albeit in secondary care, tend to be more positively evaluated (8, 9) and minimal research has been conducted into the contribution of HVs. Research into the role of the CP in dermatology care is limited (10) and expertise may be suboptimal (11) despite CPs reports of being at least reasonably confident in their role (12). The role of the pharmacy counter assistant is equally under-researched although they are often first point of contact for customers and may offer health advice independent of pharmacists (10, 13).

The mainstay of eczema treatment is the regular application of emollients, at least daily and often for many years, with or without intermittent topical steroids and calcineurin inhibitors. Non-adherence results from the high self-management demand of applying topical treatments (14) but also lack of information and conflicting advice from different health professionals (15). Despite available evidence (for example the Global Resource for Eczema Trials database (16) and the National Institute for Health and Care Excellence, Guideline for Eczema (17)) providing evidence-based treatment appears to be a challenge for health professionals managing eczema (18).

1 Marked copy BMJ Open KM Practitioner mindlines R2 24.5.19

2 Self-management is a policy imperative which can improve disease outcomes and quality of life for people  
3  
4 living with long-term conditions (19). Strategies to support eczema self-management are poorly  
5  
6 understood, have limited availability, can be costly and have variable impact (20). Eczema is not classified  
7  
8 as a long-term condition in the same way as other illnesses for example asthma (21).  
9

10  
11  
12  
13 Primary care practitioners are expected to deliver evidence-based practice (EBP). Evidence based medicine  
14  
15 (EBM) was originally the preserve of doctors and was defined as “the conscientious, explicit, and judicious  
16  
17 use of current best evidence in making decisions about the care of individual patients” (22). Over time,  
18  
19 other professions have embraced EBP but this has, at times, been conceptualised as a set of research-based  
20  
21 facts which if disseminated to practitioners will ensure more standardised, high quality care (23); this  
22  
23 notion is now largely dismissed (24). Primary care practitioners face particular challenges in EBP given the  
24  
25 volume of information they need and information overload is a real problem (25).  
26  
27  
28  
29

30  
31 The study of knowledge mobilisation (KM) is growing exponentially in health care, at its simplest it is  
32  
33 “moving knowledge to where it can be most useful” (26). KM involves determined efforts to create, share  
34  
35 and use research and other forms of knowledge predicated on the understanding that to be effective KM  
36  
37 activity must be relational, constructed from social interaction and context-specific (27-29).  
38  
39  
40  
41

42 Mindlines, developed from a primary care based ethnographic study (30) offer a “real world” approach to  
43  
44 mobilising knowledge and changing clinical practice. Mindlines are “collectively reinforced, internalised  
45  
46 tacit guidelines” which underpin clinical decision-making (30). They build on the work of Polanyi (31) and  
47  
48 Nonaka and Takeuchi (32) who propose that knowledge is not necessarily conscious and explicit, and that  
49  
50 tacit knowledge in the form of unconscious schemata and technical know-how, are dominant influencers of  
51  
52 action compared with formal codified knowledge. Gabbay and LeMay (28) suggest that mindlines are based  
53  
54 on flexible, embodied and intersubjective understanding of knowledge that is grounded in the acceptance  
55  
56 that there are multiple realities and that knowledge is context-specific. Mindlines represent a complex  
57  
58 amalgamation of knowledge gathered from many sources for example, communication with colleagues and  
59  
60

Marked copy BMJ Open KM Practitioner mindlines R2 24.5.19

1  
2 opinion leaders in the field and from tacit knowledge developed over time (28). In their original work,  
3  
4 Gabbay and LeMay (30) examined the construction of mindlines across primary care. A subsequent  
5  
6 synthesis of 10 years of mindline literature (n=340) reports that they have been conceptualised and used in  
7  
8 four distinct ways. “Nominal” in which the term was used in name only, sometimes with a degree of  
9  
10 scepticism, “in practice” examining how mindlines are developed and spread in everyday practice,  
11  
12 “theoretical and philosophical” in which the aim was to extend existing theory and “solution focused”,  
13  
14 exploring ways in which mindlines can be influenced. Solution focused papers (n=28) emphasise the  
15  
16 importance of collaborative learning, relationship building and effective leadership in the development of  
17  
18 valid, collective, evidence-based mindlines. This review reveals a paucity of information about development  
19  
20 or strategies to amend condition specific mindlines (33). Repeating the search strategy utilised for this  
21  
22 review in 2018 revealed an abundance of further related literature but little directly addressing condition  
23  
24 specific mindlines or how they may best be amended.  
25  
26  
27  
28  
29  
30

31 Given the prevalence of eczema, the challenges of primary care consultations and the high self-  
32  
33 management demand, it is prudent to investigate the way in which eczema mindlines are constructed by  
34  
35 practitioners. This will inform understanding of mindlines “in practice” and will underpin future “solution  
36  
37 focused” work to develop novel, context-specific, simple and pragmatic strategies to revise or modify  
38  
39 eczema mindlines by adding reliable and useful knowledge and by erasing outdated or inaccurate  
40  
41 information, thus potentially improve quality of eczema care and self-management.  
42  
43  
44  
45  
46

## 47 **Method**

### 48 *Aim*

49 To understand construction of healthcare practitioner atopic eczema mindlines in primary care.

### 50 *Design*

51 An ethnographic approach was employed. Ethnography is founded in anthropology and is concerned with  
52  
53 the systematic study of people and cultures (34). Data is collected through extensive observation with  
54  
55  
56  
57  
58  
59  
60

1 Marked copy BMJ Open KM Practitioner mindlines R2 24.5.19

2 informal conversations, field notes and interviews (35, 36). Data was collected in one large general practice  
3  
4 in England.  
5  
6  
7

8 *Setting, participants and process*  
9

10 Data were collected by the author, a nurse and researcher, from January - June 2017. The General Practice  
11 was identified by a local Clinical Research Network. It was a research and education active urban general  
12 practice in a demographically diverse and deprived area of England with a patient population of  
13 approximately 10,000. Observations were also conducted in a community pharmacy adjacent to the  
14 practice, which was used by most patients. No practitioners reported a special interest in dermatology. In  
15 preparation for data collection the researcher attended two practice meetings to outline conduct of the  
16 study. Data were collected in more than 250 hours of observation during all surgery opening hours. The  
17 role of social-participant-as-observer, that is, predominantly observer with some social functions such as  
18 cleaning couches was taken (37). Observation began with the reception team to understand the day-to-day  
19 working of the practice. Observation of consultations with GPs, GP trainees and locums, nurses, health  
20 visitors in baby clinics, held on the practice premises, and pharmacy staff followed. GP telephone  
21 consultations were listened to and discussed with the practitioner. Field notes were documented and  
22 informal conversations either written contemporaneously or audio-recorded. Entire clinics were attended  
23 regardless of presenting complaint, to gain understanding in the context of other long-term conditions.  
24 Between consultations practitioners recounted recent eczema consultations. Available documentation was  
25 reviewed. Single, semi-structured interviews using a topic guide (Table 1) were conducted with  
26 practitioners from each profession (n=16) (Table 2) using maximum variation purposive sampling (38) to  
27 ensure a mix of job role and level of experience. A predominance of female participants was reflective of  
28 the profile of the healthcare team. The complete dataset is summarised in Table 3.  
29  
30  
31  
32  
33  
34  
35  
36  
37  
38  
39  
40  
41  
42  
43  
44  
45  
46  
47  
48  
49  
50  
51  
52  
53  
54  
55

56 Table 1: Practitioner interview topic guide

- |                                                                                                                                                                                                  |
|--------------------------------------------------------------------------------------------------------------------------------------------------------------------------------------------------|
| <ul style="list-style-type: none"><li>57 • Do you have any special interest in skin health?</li><li>58</li><li>59 • How much contact do you have with patients with eczema?</li><li>60</li></ul> |
|--------------------------------------------------------------------------------------------------------------------------------------------------------------------------------------------------|



Marked copy BMJ Open KM Practitioner mindlines R2 24.5.19

- What sort of treatments do you use most often?
- How do you decide on a particular treatment?
  - What impact does the local formulary have on your prescribing?
- How much are you able to advise patients on how to care for their eczema?
  - Concordance etc
- How do you update your own knowledge about eczema?
- How could we best get research information to use in your practice?
  - What methods do you use now?
  - Can you give any specific examples?
- Do patients come with their own ideas about the treatment they need?
- How much do you and your patient share the decision about what treatment to use?
- How do you reconcile patient's needs with what is available?
- Do you refer patients to any external sources of information?

Table 2: Demographic details of interview participants

| Role                   | Gender | Years in current role |
|------------------------|--------|-----------------------|
| Health visitor         | Female | 10                    |
| GP                     | Male   | 35                    |
| GP Trainee             | Female | 2                     |
| Practice nurse         | Female | 31                    |
| Practice nurse         | Female | 32                    |
| Pharmacist             | Male   | 8                     |
| GP Trainee             | Female | 5                     |
| Pharmacist             | Female | 12                    |
| Pharmacy counter staff | Female | 10                    |
| Pharmacy counter staff | Female | 17                    |

Marked copy BMJ Open KM Practitioner mindlines R2 24.5.19

|                |        |   |
|----------------|--------|---|
| GP Trainee     | Female | 7 |
| GP             | Female | 6 |
| GP             | Female | 5 |
| Health visitor | Female | 2 |
| Health visitor | Female | 2 |
| Health visitor | Female | 3 |

Table 3: Complete dataset

|                                                                                                                                                                                                                                                                                                                                                                                                                                                                                                                                                                                                                                                                  |
|------------------------------------------------------------------------------------------------------------------------------------------------------------------------------------------------------------------------------------------------------------------------------------------------------------------------------------------------------------------------------------------------------------------------------------------------------------------------------------------------------------------------------------------------------------------------------------------------------------------------------------------------------------------|
| <p><b>Observations and informal interviews</b></p> <p>1 General practice</p> <p>10 sessions observing reception and waiting room</p> <p>9 sessions observing in baby clinics</p> <p>2 sessions observing in community pharmacy</p> <p>24 sessions observing GPs</p> <p>5 sessions with practice manager</p> <p>Multiple informal meetings and one to one informal discussions</p> <p>4 practice meetings</p> <p>6 debriefs with GP trainees</p> <p><b>Formal interviews</b></p> <p>16, details provided in table 2</p> <p><b>Documentary sources</b></p> <p>Local prescribing guidelines</p> <p>Online guidance accessed by practitioners during observation</p> |
|------------------------------------------------------------------------------------------------------------------------------------------------------------------------------------------------------------------------------------------------------------------------------------------------------------------------------------------------------------------------------------------------------------------------------------------------------------------------------------------------------------------------------------------------------------------------------------------------------------------------------------------------------------------|

Interviews were conducted in the workplace and lasted from 22-40 minutes. Data sufficiency was achieved when no new insights were forthcoming (39). For completeness documents and websites were reviewed

1 Marked copy BMJ Open KM Practitioner mindlines R2 24.5.19

2 including the NICE Clinical Guidance for Eczema (17), the local emollient formulary and the Clinical

3 Knowledge Summary (40) and GP notebook pages (41) for eczema.

4  
5  
6  
7  
8 Data collection and analysis were iterative with initial findings being used to guide further collection (42).

9  
10 Audio-data were professionally transcribed and transcripts read against the recording by the researcher to  
11 confirm accuracy. Data analysis was completed independently by the researcher, though the lenses of  
12 mindlines and self-management. Transcripts and field notes were read in full to get a sense of the data as a  
13 whole, and then manually coded, categorised and merged into themes and annotated with researcher  
14 inductive interpretations (see table 4 for worked example). Post theme development, relevant sections of  
15 the data were revisited to ensure authentic interpretation and use of participant language.  
16  
17  
18  
19  
20  
21  
22  
23

24 Table 4: Example of data analysis process

| 26 Codes (from interview and observational data)                                                                                                                                                                                           | 27 Categories             | 28 Theme             |
|--------------------------------------------------------------------------------------------------------------------------------------------------------------------------------------------------------------------------------------------|---------------------------|----------------------|
| 29 GP interview<br>• Eczema “simple to treat” nothing much has changed over the years – it’s bread and butter to us                                                                                                                        | It’s simple to treat      | Beliefs about eczema |
| 31 HV interview<br>• Basics are the same, but there’s lots of personal preference                                                                                                                                                          |                           |                      |
| 33 GP interview<br>• Common complaint “know by heart”                                                                                                                                                                                      |                           |                      |
| 35 Observational data<br>• Perception from GPs that it’s a straightforward condition, treatment is fairly standard and that there is limited need for further knowledge. Intranet rarely used but fairly standard set of resources for GPs |                           |                      |
| 40 GP interview<br>• Software will fire up a message if another product should be used                                                                                                                                                     | No need to think too much |                      |
| 42 Pharmacist interview<br>• Script Switch – computer tells you if you are prescribing the wrong thing and suggests an alternative                                                                                                         |                           |                      |
| 44 Observational data<br>• Belief that guidance is more about cost that research                                                                                                                                                           |                           |                      |
| 46 Observational data<br>• Eczema is not a condition that is mentioned in “learning” interactions such as debriefs                                                                                                                         |                           |                      |

### 53 *Reflexivity*

54 Reflexivity was maintained throughout the study with particular attention being paid to subjectivity and  
55 positioning as a nurse and skin health researcher; pre-understandings were consciously set aside (43).  
56  
57  
58  
59  
60

1 Marked copy BMJ Open KM Practitioner mindlines R2 24.5.19

2 *Patient and Public Involvement*

3  
4 Lay people, from an eczema support group, were involved in the development of the research question and  
5  
6 in planning the design of the study. They contributed through one meeting and a series of email exchanges.  
7  
8  
9

10  
11 **Results**

12  
13 Data analysis resulted in three themes: beliefs about eczema; eczema knowledge and approaches to self-  
14  
15 management. Each is discussed with examples from the data below.  
16  
17

18  
19  
20  
21  
22 *Theme 1: Beliefs about eczema*

23  
24 Eczema was consistently viewed as a “*bread and butter*” [GP] condition that accounted for many  
25  
26 consultations. However, although 19.5% of the practice population was recorded as having some type of  
27  
28 eczema few consultations primarily for this condition were observed. Analysis of patient reported reason  
29  
30 for GP consultation for a typical week during observation revealed that 26/627 (4.1%) of reasons were skin  
31  
32 related with none citing eczema as the primary complaint. No observed face-to-face consultations were  
33  
34 primarily for eczema; it was reported as a secondary concern in a small number of number of GP  
35  
36 consultations and more often to HVs in baby clinics. This resulted in eczema necessarily being given limited  
37  
38 attention “*it’s often a secondary problem and there’s only time to deal with one problem per consultation*”  
39  
40 [GP]. Telephone consultations with GPs were witnessed and patients were observed to consult with  
41  
42 pharmacy staff about their eczema. Practitioners mainly viewed eczema as a nuisance condition requiring  
43  
44 limited knowledge to treat effectively, “*eczema is simple to treat, nothing much has changed over the*  
45  
46 *years*” [GP] and “*the recipe doesn’t change* [GP]”.

47  
48  
49  
50  
51  
52  
53 Some GPs described eczema as a “*catch up*” [GP] consultation when clinics were over-running. GPs and  
54  
55 nurses noted the absence of specific external incentives for long-term eczema management and that it was  
56  
57 a condition without the “*red flags*” [GP] which trigger treatment escalation or referral. They described  
58  
59 treatment options as straightforward involving emollients with or without intermittent topical steroids.  
60

Marked copy BMJ Open KM Practitioner mindlines R2 24.5.19

1  
2 Few mentioned calcineurin inhibitors or other available medications. Most practitioners considered  
3  
4 emollients to be a homogenous group of preparations all with similar properties, although a few  
5  
6 differentiated in terms of viscosity and texture. Pharmacy staff and HVs were familiar with a broader range  
7  
8 of emollient products and were more likely to offer suggestions for over the counter preparations. This was  
9  
10 in part because no HVs in this study were able to prescribe. GPs were reluctant to prescribe topical steroids  
11  
12 or other treatments unless absolutely necessary. PNs rarely saw patients with atopic eczema.  
13  
14  
15  
16

17  
18 Practitioners recognised that eczema could have a negative impact on wellbeing and quality of life but this  
19  
20 was not often reflected in the care offered. Treatment was mainly in reaction to a flare rather than there  
21  
22 being a long-term plan of care. Generally patients were able to access regular repeat prescriptions for  
23  
24 emollients and practitioners expressed a level of frustration when they presented with a flare having not  
25  
26 requested or used the prescribed treatments. Although 'safety netting' was always in place, planned  
27  
28 follow-up consultations were not suggested. Empathy for patients was most evident in practitioners who  
29  
30 had personal experience of eczema, they articulated a varying level of understanding about the differences  
31  
32 between products, regardless of available empirical evidence, and the extent to which personal preference  
33  
34 influenced concordance. Pharmacy counter staff were the most conversant with the differences between  
35  
36 emollient products having tried samples, and they were most likely to share this knowledge with patients /  
37  
38 customers verbally and in leaflets.  
39  
40  
41  
42  
43

44  
45 Although eczema was viewed as a frequent reason for consultation, it was mainly presented as a secondary  
46  
47 concern and so dealt with swiftly. Eczema was considered simple to treat with little change over time  
48  
49 although practitioners with personal experience of eczema were more aware of the challenges of self-  
50  
51 management and tolerant of personal treatment preferences.  
52  
53  
54

### 55 *Theme 2: Atopic eczema knowledge*

56  
57 Beliefs about eczema influenced the formation of mindlines and for most mindlines were set against a  
58  
59 backdrop of eczema being a low priority condition and a perception of unchanging treatment options which  
60

1 Marked copy BMJ Open KM Practitioner mindlines R2 24.5.19

2 were constrained by local prescribing guidelines (Figure 1). Many practitioners described AE as a common  
3  
4 conditions for which you *“know [treatment] by heart [GP]”* and likened his response to using a  
5  
6 *“satnav .....you stop thinking, the little NHS boxes [on the computer] tell you what to prescribe [GP]”*.  
7  
8  
9

10 Most practitioners reported that their eczema knowledge was based on their initial education and  
11  
12 recognised *“pre-reg dermat education was very, very basic”* [GP]. A few had completed dermatology  
13  
14 placements during GP training but reported seeing little eczema. One experienced GP recounted learning  
15  
16 from a consultant, her practice was unchanged as she had *“learnt from a consultant many years ago and  
17  
18 never heard anything to contradict it”* [GP]. PNs and GPs were aware of available dermatology education  
19  
20 but did not attend as it was a low priority and costly, *“there is training but you have to pay”* [PN] and they  
21  
22 preferred to *“avoid reps and sponsored sessions”* [GP]. HVs reported that skin health was never an  
23  
24 educational priority. Pharmacist’s knowledge was updated through e-bulletins from different sources and  
25  
26 covered only changes in, and availability of, medications. Only PCS received eczema specific education by  
27  
28 attending regular seasonal sessions provided by their employer. Although deemed to be useful, particularly  
29  
30 as they tried products and were advised on correct application, the educational experience was sometimes  
31  
32 suboptimal as one reported how she was *“shamed into remembering”* [PCS] session content.  
33  
34  
35  
36  
37  
38  
39

40 Local emollient guidelines underpinned many prescribing decisions so practitioners did not need to think as  
41  
42 *“software will fire up a message if another product should be used”* [CP]. Changes to guidelines were  
43  
44 ascribed to cost and *“what was in vogue”* [GP]. Practitioners were not concerned about these changes  
45  
46 stating for example, *“aqueous cream, they’ve gone off that idea for some reason”* [PCS] and *“Zero products  
47  
48 are the ones that are currently on trend”* [GP trainee]. Whilst some prescribers stuck rigidly to prescribing  
49  
50 the cheapest product, *“I try to be good and prescribe the cheaper side of things”* [GP trainee], others were  
51  
52 more flexible according to their own or the patient’s preference. However, deviations from the formulary  
53  
54 were rare on the basis that *“local formulary is very constraining and you’d have to be able to justify why  
55  
56 you’d prescribed anything else”* [GP]. Exceptions were observed in the baby clinic and in pharmacy practice  
57  
58 where patients were often informed about a wider range of emollients that could be purchased over the  
59  
60

1 Marked copy BMJ Open KM Practitioner mindlines R2 24.5.19

2 counter. For those who paid a prescription charge this could often be more cost effective. PCS suggested  
3  
4 that they were able to advise patients readily as they had *“tried samples so you can tell the customers what*  
5  
6 *they feel like”* [PCS].  
7

8  
9  
10 Other knowledge sources contributed to eczema mindlines. All staff, with the exception of experienced  
11  
12 GPs, used internet searches most commonly the online resources GP Notebook and Clinical Knowledge  
13  
14 Summaries. Useful websites were often book-marked and visited in preparation for a consultation rather  
15  
16 than alongside the patient. If information was not located almost immediately the practitioner switched to  
17  
18 another website *“we’re hard wired for speed now”* [GP] and *“dipped into what’s relevant”* [GP] as and when  
19  
20 required. None mentioned existing NICE Eczema Guidance. Local emollient guidelines existed and  
21  
22 influenced the prescribing practice of most practitioners, however others were unaware of these and some  
23  
24 found them hard to access. GPs and HVs used different emollient guidelines and this caused confusion for  
25  
26 patients when they consulted both. A member of pharmacy staff noted the need for *“a synchronised*  
27  
28 *approach so patients don’t get confused”* [PCS]. Practitioners also experienced confusion when offering  
29  
30 advice on treatment application, for example *“treatment is a bit arbitrary – for example should you advise*  
31  
32 *steroid or emollient first?”* [HV].  
33  
34  
35  
36  
37  
38  
39

40 Practitioners learnt from each other to a limited extent, most often within their professional groups. They  
41  
42 recognised *“we learn both good and bad habits from each other”* [PN]. Opportunities for shared learning  
43  
44 had reduced as there was little time to meet up and in-house teaching for GPs and PNs had *“fallen by the*  
45  
46 *wayside”* [GP] due to staff sickness and pressure of work. One GP reported *“phoning a friend”*, now a  
47  
48 consultant dermatologist, when she needed advice. GPs reported learning from trainees during debrief  
49  
50 sessions but could not recall ever having discussed eczema. Trainees exhausted all available information  
51  
52 sources before seeking advice from a GP. HVs and PNs met more frequently and exchanged knowledge  
53  
54 more regularly, although eczema was not a condition of interest.  
55  
56  
57  
58  
59  
60

1 Marked copy BMJ Open KM Practitioner mindlines R2 24.5.19

2 Practitioners expressed varied views on the value of patient knowledge and experience and the extent to  
3 which it influenced care. PNs, HVs and pharmacy staff respectively reported that they routinely *“ask patient*  
4 *what they have tried already”* [PN], *“see what’s worked for them”* [HV] and *“listen and learn from*  
5 *customers”* [PCS] and used this information as a basis for treatment advice. Others listened to patients with  
6 a degree of scepticism but acquiesced to patient preference, *“patients often have fixed ideas [about*  
7 *emollients] and I try to accommodate these”* [GP]. A few were less receptive, for example *“I try to use*  
8 *guidelines and the formulary ..... patient experience stuff can be counterproductive”* [GP trainee] and  
9 others suggested that their wider experience overrode the patients personal preferences and experiences  
10 *“experience wise I’ve found a lot of people get on with it [particular emollient]”* [GP] and therefore that was  
11 what would be prescribed.  
12  
13  
14  
15  
16  
17  
18  
19  
20  
21  
22  
23  
24  
25

26 Only the most experienced practitioners spontaneously articulated the existence of tacit knowledge stating,  
27 *“it’s a perpetual exercise ... adding on knowledge and skills”* [GP] and *“built up knowledge over time”* [PN].  
28 Others pointed to more concrete sources of knowledge. All practitioners understood reliability of evidence  
29 to a greater or lesser extent.  
30  
31  
32  
33  
34  
35  
36  
37

38 Eczema knowledge was constructed from different sources by individual professions. Nursing and medical  
39 staff perceived a limited need to update their knowledge as eczema care was viewed as having changed  
40 little over time. Exceptions to this were practitioners who had personal experience of eczema and  
41 pharmacy staff who regularly updated their mindlines using informal and formal sources of knowledge.  
42  
43  
44  
45  
46  
47  
48

### 49 *Theme 3: Approaches to self-management*

50  
51 In principle, all practitioners supported self-management of eczema but recognised the difficulties of  
52 achieving this in practice particularly without formal recognition as a long-term condition (LTC). Some  
53 practitioners routinely used techniques to support self-management for patients with other LTCs.  
54  
55  
56  
57

58 Strategies included for example, *“finding out patients’ expectations”* [PN], *“tailoring knowledge to the*  
59 *person”* [GP], *“start with what the patient understands and then fill in the gaps”* [GP], *“give patients a map*  
60



Marked copy BMJ Open KM Practitioner mindlines R2 24.5.19

1  
2 *of management*” [GP], *“instil confidence”* [GP] and *“reinforce that self-management is good”* [GP trainee]. A  
3  
4 few GPs used specific techniques such as *“short bursts of CBT”* [GP], *“motivational interviewing*  
5  
6 *techniques ..... compressed to fit in consultation”* [GP] and *“behaviour modification ..... not a one*  
7  
8 *consultation job”* [GP]. Even practitioners who did not articulate using strategies to support self-  
9  
10 management integrated them in practice for many LTCs. However they were rarely observed or discussed  
11  
12 in relation to eczema.  
13  
14  
15  
16

17  
18 Most eczema care was reactive when patients presented with a flare and talk of eczema care was almost  
19  
20 exclusively about treatment options. Virtually no attention paid to ensuring that the patient understood the  
21  
22 condition and actions they could take to avoid the relentless cycle of flares. The most tangible contribution  
23  
24 to self-management was the availability of repeat prescriptions for emollients but advice to use these  
25  
26 consistently was lacking. Barriers to self-management were observed, for example the appointment system  
27  
28 often precluded patients seeing the same GP over time, so treatment could be altered without the benefit  
29  
30 of fully understanding the patient journey to date. Contradictory advice given by practitioners and a lack of  
31  
32 faith in patient’s ability to judge when they needed to use topical steroids and to use them safely presented  
33  
34 significant barriers to successful self-management. Practitioners suggested they *“need to see patients*  
35  
36 *before prescribing [topical] steroids”* [GP]. One GP stated that *“sensible”* patients may get steroids on  
37  
38 repeat but struggled to define sensible in this context. Pharmacy staff did not recognise their contribution  
39  
40 to self-management per se, but recognised the positive impact they had on eczema management through  
41  
42 *“actually taking notice of what they’re telling me”* [PCS] and perceived *“they do trust me ..... I’m*  
43  
44 *well known in the local community”* [PCS] and were therefore easy for customers to speak with.  
45  
46  
47  
48  
49  
50

51  
52 Whilst recognising the need for self-management the fact that eczema is not categorised as a long-term  
53  
54 condition limited how much patients were supported to self-manage and at times healthcare systems could  
55  
56 hinder attempts.  
57  
58  
59  
60

1 Marked copy BMJ Open KM Practitioner mindlines R2 24.5.19

2 **Discussion**

3  
4 This study offers new insights into how primary care practitioners construct atopic eczema specific  
5  
6 mindlines. Practitioner mindlines are predominantly set against a back drop of eczema being a low priority,  
7  
8 due to a combination of not being viewed as an LTC and so lacking external incentives, and the perception  
9  
10 of available treatments being standard use of emollients and topical steroids, which changes little over time  
11  
12 and is constrained by prescribing guidelines. This led to an assumption that there was little need to amend  
13  
14 mindlines. Eczema mindlines were developed early in their career by many practitioners and were relatively  
15  
16 static amongst GPs, PNs and HVs, except for those with direct personal experience of eczema. Mindlines of  
17  
18 pharmacy staff were regularly modified through a combination of education provided by their employer,  
19  
20 electronic updates from professional bodies and interactions with customers. The latter was particularly  
21  
22 influential for the PCSs as they generally had more time to listen and had built up trusting relationships  
23  
24 with the customers over time.  
25  
26  
27  
28  
29

30  
31 This study is one of few to apply mindline theory to a specific condition across a broad range of  
32  
33 practitioners. In particular it identifies important differences in the way in which eczema mindlines are  
34  
35 developed and so may best be amended for individual practitioner groups. This study conforms with  
36  
37 conventions of robust qualitative work in that it is rigorous (coherent and sufficiently well reported to be  
38  
39 open to external audit), relevant (enriches understanding of the subject), resonant (resonates with readers  
40  
41 experiences and understandings) and reflexive (subjectivity of the author is acknowledged) (44). Limitations  
42  
43 include the ethnographer being a lone worker and data analysis being completed by the researcher alone,  
44  
45 however this is mitigated by conversations with participants to check understandings. As data were  
46  
47 collected in one general practice, findings may not be transferable but the diversity of participants should  
48  
49 minimise this risk (45). Additionally no nurse practitioners were included as, at the time of data collection,  
50  
51 none were employed in the practice.  
52  
53  
54  
55  
56

57  
58 As with the original conceptualisation of Gabbay and leMay (30), practitioner eczema mindlines are  
59  
60 composed over time, from a range of evidence sources which rarely embrace direct use of research.

1 Marked copy BMJ Open KM Practitioner mindlines R2 24.5.19

2 Gabbay and le May (28) point to the critical nature of knowledge-in-practice-in-context in which in each  
3  
4 context new knowledge is converted by the complex social processes of the Socialization, Externalization,  
5  
6 Combination, Internalization spiral (32). Context was central in the formation of eczema mindlines but was  
7  
8 informed more by long-held beliefs and national policy than by local context. Key differences in this study  
9  
10 are that mindline development has evolved alongside the changing nature of primary care where  
11  
12 practitioners, particularly GPs, appear to work more in isolation than as part of a community with “coffee  
13  
14 room chat” (46) appearing much reduced. In parallel, available online resources have spiralled thus  
15  
16 potentially reducing the need to confer with others. This challenges the notion that mindlines are heavily  
17  
18 reliant on professional interactions (28). The static nature of eczema mindlines and the beliefs  
19  
20 underpinning eczema care meant that they were accessed using fast, automatic, System 1 thinking rather  
21  
22 than the more deliberative, conscious, slow and effortful System 2 approach (47).  
23  
24  
25  
26  
27

28  
29 Few studies have investigated condition specific mindlines with the exception of a Tanzanian study of  
30  
31 malaria diagnosis (48), however the depiction here is more akin to rules of thumb or heuristics. A  
32  
33 comprehensive commentary on mindlines identifies 76 papers categorised as “in practice”, that is studies  
34  
35 of how mindlines are developed, many of these used the term to mean consulting with colleagues (33). A  
36  
37 smaller number were faithful to the original Gabbay and Le May’s conceptualisation but add little by way of  
38  
39 new understanding. More recently, Wieringa and colleagues (49) investigated mindlines development in  
40  
41 online clinical communities concluding that they offered collective, dynamic settings and suggest implicitly  
42  
43 that they may be areas for mindline amendment. Whilst online communities may appeal to some  
44  
45 practitioners, this will not be so for all.  
46  
47  
48  
49  
50

51 In this study eczema was consider low priority. These beliefs are longstanding with surveys suggesting that  
52  
53 both patients and practitioners perceive dermatology as a poor relation in healthcare (50-52) and Magin  
54  
55 and colleagues (4) describing ‘dismissive’ and ‘unsympathetic’ attitudes amongst GPs. Eczema appears to  
56  
57 be considered as “health problem which is not an illness” (53) and therefore less legitimate and worthy  
58  
59 than other conditions. Ambivalence about eczema specific learning was in contrast to a survey which  
60

1 Marked copy BMJ Open KM Practitioner mindlines R2 24.5.19

2 indicated a desire for new knowledge, particularly in the form of education delivered by consultants (54);  
3  
4 inevitably GPs completing the survey would be those with an interest in dermatology. The dermatology  
5  
6 community has used many strategies to make research findings accessible to all with limited success (55).  
7  
8 In contrast with this study in which treatment for eczema was viewed as simple others report GPs  
9  
10 uncertainty about managing eczema (56).  
11  
12  
13  
14

15 Achieving change in primary care practice is challenging, interventions most likely to influence practice  
16  
17 demonstrate evidence of benefit, are simple to use and adaptable to local context (57). The context of  
18  
19 eczema mindlines, that it is a low priority condition with a limited repertoire of treatment options, is  
20  
21 unlikely to change in the foreseeable future. If, like other LTCs, eczema was recognised in the Quality and  
22  
23 Outcomes Framework (58) patients may benefit from the accelerated trends towards systematic  
24  
25 management (59). Practitioners in primary care are expert generalists (60) and are expected to have  
26  
27 knowledge of many conditions for which there is wealth of available evidence. This may lead to information  
28  
29 overload for which coping strategies are needed. Bate and colleagues (61) describe “satisficing” that is,  
30  
31 curtailing the amount of information gathered to enable them to make a “good enough” decision.  
32  
33  
34  
35  
36  
37

38 In many ways it can be argued that treatment of eczema in primary care is relatively straightforward and  
39  
40 that amendment of mindlines to adjust thinking about emollients and removal of outdated information  
41  
42 about topical steroid use could make a significant change in practice that would improve both patient  
43  
44 experience and self-management practices. Brevity and accessibility of information is key as practitioners  
45  
46 have been found to judge the usefulness of new knowledge as function of its relevance x validity ÷ by the  
47  
48 work needed to access it (62). It is possible that straightforward messages could be conveyed through  
49  
50 media such as aphorisms, “succinct sayings that offer advice” (63) or actionable nuggets “knowledge  
51  
52 translation tools designed to provide ..... concise practical information about the most prevalent and  
53  
54 pressing primary care needs of patients” (64). This approach offers the opportunity to compensate for the  
55  
56 loss of professional wisdom through personal communication by transmitting concentrated wisdom and  
57  
58 guidance in a different way (63).  
59  
60

1 Marked copy BMJ Open KM Practitioner mindlines R2 24.5.19

2  
3  
4 Efforts to amend GPs, PNs and HVs mindlines need to be accessible via rapid System 1 thinking.

5  
6 Interventions should be specific, practical, tailored, relevant and rapidly delivered information which can  
7  
8 readily be assimilated, or as participants in this study described it, a “no faff” approach. Given their time  
9  
10 constraints and information gathering habits, any new information would best be delivered individually  
11  
12 rather than in a group setting and available online and possibly in other formats.  
13  
14  
15

16  
17 The role of the community pharmacist in eczema care is evolving partly in response to Pharmaceutical  
18  
19 Services Negotiating Committee guidance on Medicines Use Reviews (65), New Medicine Service (66) and  
20  
21 Minor Ailment Service (67). Forthcoming changes in availability of emollients on prescription may increase  
22  
23 their role further. Pharmacy staff described eczema mindline development as a more collective  
24  
25 experience than other practitioners and valued learning from each other and from customers. They may be  
26  
27 open to group approaches to update and remove redundant information from their mindlines and this  
28  
29 would need to be brokered through both professional and employing organisations.  
30  
31  
32  
33  
34  
35

### 36 **Conclusion**

37  
38 This ethnographic study provides new understandings about the development of atopic eczema specific  
39  
40 mindlines in different practitioner groups in primary care. The outstanding challenge is to find novel,  
41  
42 context-specific, simple, pragmatic strategies to revise or modify these mindlines by adding reliable and  
43  
44 useful knowledge and by erasing outdated or inaccurate information using strategies that are most  
45  
46 appropriate to each profession. Mindline amendment has the potential to improve self-management and  
47  
48 quality of eczema care through the delivery of consistent, evidence-based care.  
49  
50  
51  
52  
53  
54  
55  
56  
57  
58  
59  
60

1  
2  
3  
4  
5  
6  
7  
8  
9  
10  
11  
12  
13  
14  
15  
16  
17  
18  
19  
20  
21  
22  
23  
24  
25  
26  
27  
28  
29  
30  
31  
32  
33  
34  
35  
36  
37  
38  
39  
40  
41  
42  
43  
44  
45  
46  
47  
48  
49  
50  
51  
52  
53  
54  
55  
56  
57  
58  
59  
60

Marked copy BMJ Open KM Practitioner mindlines R2 24.5.19

### **Contribution statement**

FC is the sole contributor to this paper

### **Funding**

Fiona Cowdell is funded by a National Institute for Health Research, Knowledge Mobilisation Research Fellowship, KMRF-2015-04-004.

### **Disclaimer**

This paper presents independent research funded by the National Institute for Health Research. The views expressed are those of the author and not necessarily those of the NHS, the NIHR or the Department of Health and Social Care.

### **Ethical approval**

The study was approved by a National Health Service REC (16/YH/0252). Process consent was used for observation, on each occasion informal conversations were used to re-check participant's willingness to be observed. Patients were informed about the study by practitioners and when necessary the researcher exited individual consultations, either at the request of the patient, the practitioner or using personal judgment, although this was infrequently needed. Written consent was taken for audio-recorded interviews. Interview participants consented to publication of anonymised information.

### **Competing interests**

None to declare

### **Acknowledgements**

Thanks to Amanda Roberts who have given invaluable lay feedback on the planning and design of this study. Thanks to James Mycock, Birmingham City University for the mindline illustration and to Professors Hywel William and Stephen Timmons, University of Nottingham for their valuable feedback on earlier iterations of this manuscript.

### **Data sharing statement**

The datasets generated and/or analysed during the current study are not publicly available as they are not designed to be re-analysed by others but are available from the corresponding author on reasonable request.

Marked copy BMJ Open KM Practitioner mindlines R2 24.5.19

## References

1. Hay RJ, Johns NE, Williams HC, et al. The global burden of skin disease in 2010: an analysis of the prevalence and impact of skin conditions. *J Invest Dermatol.* 2014; 134: 1527-1534.
2. Schofield J, Grindlay D, Williams H, Skin conditions in the UK: a health care needs assessment. Centre of Evidence Based Dermatology, University of Nottingham; 2009.
3. Cowdell F. Knowledge mobilisation: an ethnographic study of the influence of lay mindlines on eczema self-management in primary care in the United Kingdom. *BMJ Open.* In press
4. Magin P, Adams J, Heading G, Pond C. Patients with skin disease and their relationships with their doctors: a qualitative study of patients with acne, psoriasis and eczema. *Med J Aust.* 2009; 190:62-64
5. Santer M, Burgess H, Yardley L, et al. Experiences of carers managing childhood eczema and their views on its treatment: A qualitative study. *Br J Gen Pract.* 2012; 62:261-267.
6. Powell K, Le Roux E, Banks J, et al. GP and parent dissonance about the assessment and treatment of childhood eczema in primary care: a qualitative study. *BMJ Open.* 2018; 8:e019633.
7. Rüksam M, Esch M, Baum E, et al. Diagnosing skin disease in primary care: A qualitative study of GPs' approaches. *Fam Pract.* 2015; 32: 591-595.
8. Nicol NH, Ersser SJ. The role of the nurse educator in managing atopic dermatitis. *Immunol Allergy Clin.* 2010; 30:369-383.
9. Rolinck-Werninghaus C, Trentmann M, Reich A, et al. Improved management of childhood atopic dermatitis after individually tailored nurse consultations: a pilot study. *Pediat Allergy Immunol.* 2015; 26: 805-810.
10. Tucker R, Stewart D. Why people seek advice from community pharmacies about skin problems. *Int J Pharm Pract.* 2015; 23(2): 150-153.
11. Tucker RP, MacLure K, Paudyal V, et al. An exploratory study of community pharmacist diagnosis and management of dermatitis and acne. *Selfcare J.* 2017; 8(2):1-10
12. Tucker R. The medicines use review in patients with chronic skin diseases: are pharmacists doing them and how confident are they? *Int J Pharm Pract.* 2013; 21:202-204.
13. Banks J, Shaw A, Weiss MC. The community pharmacy and discursive complexity: a qualitative study of interaction between counter assistants and customers. *Health Soc Care Community.* 2007; 15:313-321.
14. Santer M, Burgess H, Yardley L, et al. Managing childhood eczema: Qualitative study exploring carers' experiences of barriers and facilitators to treatment adherence. *J Adv Nurs.* 2013; 69:2493-2501.
15. Teasdale EJ, Muller I, Santer M. 2017. Carers' views of topical corticosteroid use in childhood eczema: a qualitative study of online discussion forums. *Br J Dermatol.* 2017; 176(6):1500-1507.
16. Global Resource for Eczema Trials (GREAT) database <http://www.greatdatabase.org.uk/GD4/Home/Index.php> Accessed 4.7.18
17. National Institute for Health and Care Excellence. Atopic eczema in under 12s: diagnosis and management. Clinical guideline [CG57] 2007 <https://www.nice.org.uk/Guidance/CG57>. Accessed 4.7.18
18. Powell K, Le Roux E, Banks JP, et al. Developing a written action plan for children with eczema: A qualitative study. *Brit J Gen Pract.* 2018; 68(667):e81-e89.
19. Department of Health 2014 The Mandate: A mandate from the Government to NHS England: April 2014 – March 2015 [https://www.gov.uk/government/uploads/system/uploads/attachment\\_data/file/383495/2902896\\_DoH\\_Mandate\\_Accessible\\_v0.2.pdf](https://www.gov.uk/government/uploads/system/uploads/attachment_data/file/383495/2902896_DoH_Mandate_Accessible_v0.2.pdf) Accessed 4.7.18
20. Ridd MJ, King AJL, Le Roux E, et al. Systematic review of self-management interventions for people with eczema. *Br J Dermatol.* 2017; 177(3):719-734.
21. Hanlon P, Daines L, Campbell C. et al. Telehealth interventions to support self-management of long-term conditions: a systematic metareview of diabetes, heart failure, asthma, chronic obstructive pulmonary disease, and cancer. *JMIR.* 2017; 19:e172.

Marked copy BMJ Open KM Practitioner mindlines R2 24.5.19

22. Sackett, DL, Rosenberg WM, Gray JM, et al. Evidence based medicine: what it is and what it isn't. *BMJ*. 1996; 312:71-2.
23. Greenhalgh T, Howick J, Maskrey N. "Evidence based medicine: a movement in crisis?" *BMJ* 348 (2014): g3725.
24. Brownson RC, Colditz GA, Proctor EK. eds. *Dissemination and implementation research in health: translating science to practice*. Oxford: Oxford University Press; 2017.
25. Vaucher C, Bovet E, Bengough T, et al. Meeting physicians' needs: a bottom-up approach for improving the implementation of medical knowledge into practice. *Health Res Policy Syst*. 2016; 14:49.
26. Ward V. 2017. Why, whose, what and how? A framework for knowledge mobilisers. *Evid Policy*. 2017; 13:477-497.
27. Ferlie E, Crilly T, Jashapara A, et al. Knowledge mobilisation in healthcare: a critical review of health sector and generic management literature. *Soc Sci Med*. 2012;74:1297-1304.
28. Gabbay J, Le May A. *Practice-based evidence for healthcare: clinical mindlines*. London: Routledge; 2010.
29. Plamondon K, Caxaj S. 2018. Toward Relational Practices for Enabling Knowledge-to-action in Health Systems: The Example of Deliberative Dialogue. *Adv Nurs Sci*. 2018; 41:18-29.
30. Gabbay J, le May A. Evidence based guidelines or collectively constructed "mindlines?" *Ethnographic study of knowledge management in primary care*. *BMJ*. 2004; 329:1013.
31. Polanyi M. The logic of tacit inference. *Philos*.1966; 41:1-18.
32. Nonaka I, Takeuchi H. *The knowledge-creating company: How Japanese companies create the dynamics of innovation*. Oxford: Oxford University Press; 1995.
33. Wieringa S, Greenhalgh T. 10 years of mindlines: a systematic review and commentary. *Imp Sci*. 2015; 10:45.
34. Hammersley M, Atkinson P. *Ethnography: Principles in Practice*. Abingdon: Routledge;2007.
35. Spradley JP. *Participant observation*. Illinois: Waveland Press; 2016.
36. Spradley JP. *The ethnographic interview*. Illinois: Waveland Press; 2016.
37. Cowdell F. *That's how we do it we treat them all the same: An exploration of the experiences of patients, lay carers and health and social care staff of the care of people with dementia in acute hospital settings*. Cambridge. Cambridge Publishing. 2013.
38. Tongco MD. Purposive sampling as a tool for informant selection. *Ethnobotany Research and Applications*. 2007. 31; 5:147-58.
39. O'Reilly M, Parker N. 'Unsatisfactory Saturation': a critical exploration of the notion of saturated sample sizes in qualitative research. *Qual Res*. 2013; 13:190-197.
40. Clinical Knowledge Summaries. Eczema – atopic <https://cks.nice.org.uk/eczema-atopic> Accessed 4.7.18
41. GP Notebook. Eczema <http://www.gpnotebook.co.uk/simplepage.cfm?ID=-623902719> Accessed 4.7.18
42. Polkinghorne DE. Language and meaning: Data collection in qualitative research. *J Couns Psychol*, 2005; 52(2):137.
43. Matua GA, Van Der Wal DM. Differentiating between descriptive and interpretive phenomenological research approaches. *Nur Res*. 2015; 22(6):22.
44. Finlay L. *Phenomenology for psychotherapists: Researching the lived world*. Oxford: Wiley Blackwell; 2011.
45. University of Hertfordshire 2017 Disadvantages of Ethnographic Research [http://www.health.herts.ac.uk/immunology/Web%20programme%20-%20Researchhealthprofessionals/disadvantages\\_associated\\_with\\_et.htm](http://www.health.herts.ac.uk/immunology/Web%20programme%20-%20Researchhealthprofessionals/disadvantages_associated_with_et.htm). Accessed 4.7.18
46. Gabbay J, le May. *Mindlines: making sense of evidence in practice*. *B J Gen Pract*. 2016: 402-403.
47. Kahneman D. *Thinking, Fast and Slow*. London: Penguin; 2011.
48. Chandler CI, Jones C, Boniface G et al. Guidelines and mindlines: why do clinical staff over-dignose malaria in Tanzania? A qualitative study. *Malar J* 2008;7:53
49. Wieringa S, Engebretsen E, Heggen K, et al. How knowledge is constructed and exchanged in virtual communities of physicians: qualitative study of mindlines online. *JMIR*. 2018;20: e34.



Marked copy BMJ Open KM Practitioner mindlines R2 24.5.19

- 1
  - 2
  - 3
  - 4
  - 5
  - 6
  - 7
  - 8
  - 9
  - 10
  - 11
  - 12
  - 13
  - 14
  - 15
  - 16
  - 17
  - 18
  - 19
  - 20
  - 21
  - 22
  - 23
  - 24
  - 25
  - 26
  - 27
  - 28
  - 29
  - 30
  - 31
  - 32
  - 33
  - 34
  - 35
  - 36
  - 37
  - 38
  - 39
  - 40
  - 41
  - 42
  - 43
  - 44
  - 45
  - 46
  - 47
  - 48
  - 49
  - 50
  - 51
  - 52
  - 53
  - 54
  - 55
  - 56
  - 57
  - 58
  - 59
  - 60
50. Rosoff SM, Leone MC. (1989). The prestige of dermatologists. are they "last among equals"? *Int J Dermatol.* 1989; 28:377-380.
51. Rosoff SM, Leone MC (1991). The public prestige of medical specialties: Overviews and undercurrents. *Soc Sci Med.* 1991;32:321-326.
52. Creed PA, Searle J, Rogers ME. Medical specialty prestige and lifestyle preferences for medical students. *Soc Sci Med.* 2010;71:1084-8.
53. Cornwell J. *Hard-earned lives: accounts of health and illness from East London*:Routledge Kegan & Paul;1984.
54. Soriano LF, Sahota A, Jolliffe V. An evaluation of general practitioners learning preferences in dermatology. *Education for Primary Care.* 2017; 17:1-2.
55. Baron SE, Cohen SN, Archer CB. Guidance on the diagnosis and clinical management of atopic eczema. *Clin Exp Dermatol.* 2012; 37:Suppl 1, 7-12.
56. Le Roux, E, Powell K, Banks JP, et al. GPs' experiences of diagnosing and managing childhood eczema: a qualitative study in primary care. *Br J Gen Pract.* 2018. Feb 16:bjgp18X694529.
57. Lau R, Stevenson F, Ong BN, et al. Achieving change in primary care—causes of the evidence to practice gap: systematic reviews of reviews. *Imp Sci.* 2015;11:40.
58. National Institute for Health and Care Excellence (2018) NICE Quality and Outcomes Framework indicator <https://www.nice.org.uk/standards-and-indicators/qofindicators> Accessed 4.7.18
59. Roland M, Guthrie B. Quality and Outcomes Framework: what have we learnt? *BMJ* 2016;354:i4060
60. Reeve J, Dowrick CF, Freeman GK, et al. Examining the practice of generalist expertise: a qualitative study identifying constraints and solutions. *JRSM short reports.* 2013; 4(12):2042533313510155.
61. Bate L, Hutchinson A, Underhill J, et al. How clinical decisions are made. *Br J Clin Pharmacol.* 2012; 74:614-20.
62. Cunningham M, Shirley A. Mindlines in a digital age. *Education for Primary Care.* 2015; 26:293-6.
63. Levine D, Bleakley A. Maximising medicine through aphorisms. *Med Educ.* 2012; 46:153-162
64. McColl MA, Aiken A, Smith K, et al. Actionable nuggets: knowledge translation tool for the needs of patients with spinal cord injury. *Can Fam Physician.* 2015; 61:e240-e248.
65. Pharmaceutical Services Negotiating Committee Medicines Use Review <http://psnc.org.uk/services-commissioning/advanced-services/murs/> Accessed 4.7.18
66. Pharmaceutical Services Negotiating Committee New Medicine Service <http://psnc.org.uk/services-commissioning/advanced-services/nms/> Accessed 4.7.18
67. Pharmaceutical Services Negotiating Committee Minor Ailment Service <http://psnc.org.uk/services-commissioning/locally-commissioned-services/en8-minor-ailments-service/> Accessed 4.7.18

1 Marked copy BMJ Open KM Practitioner mindlines R2 24.5.19

2 **Table 1:** Practitioner interview topic guide

3  
4 **Table 2:** Demographic details of participants

5  
6 **Table 3:** Complete dataset

7  
8 **Table 4:** Example of data analysis process

9  
10 **Figure 1:** Practitioner eczema mindlines

11  
12 Sources of information underpinning practitioner eczema mindlines.  
13  
14  
15  
16  
17  
18  
19  
20  
21  
22  
23  
24  
25  
26  
27  
28  
29  
30  
31  
32  
33  
34  
35  
36  
37  
38  
39  
40  
41  
42  
43  
44  
45  
46  
47  
48  
49  
50  
51  
52  
53  
54  
55  
56  
57  
58  
59  
60

For peer review only

1  
2  
3  
4  
5  
6  
7  
8  
9  
10  
11  
12  
13  
14  
15  
16  
17  
18  
19  
20  
21  
22  
23  
24  
25  
26  
27  
28  
29  
30  
31  
32  
33  
34  
35  
36  
37  
38  
39  
40  
41  
42  
43  
44  
45  
46  
47  
48  
49  
50  
51  
52  
53  
54  
55  
56  
57  
58  
59  
60



Practitioner eczema mindline  
371x262mm (120 x 120 DPI)

## BMJ Open Practitioner eczema mindlines COREQ 4.7.18

## COREQ Statement

Knowledge mobilisation: An ethnographic study of the influence of practitioner mindlines on eczema self-management in primary care in the United Kingdom

| Statement                                                                                                                                                                                                                                                                                                                                                                                                                                                        | Page no    |
|------------------------------------------------------------------------------------------------------------------------------------------------------------------------------------------------------------------------------------------------------------------------------------------------------------------------------------------------------------------------------------------------------------------------------------------------------------------|------------|
| <b>Domain 1: Research team and reflexivity</b>                                                                                                                                                                                                                                                                                                                                                                                                                   |            |
| <i>Personal Characteristics</i>                                                                                                                                                                                                                                                                                                                                                                                                                                  |            |
| 1. Interviewer/facilitator Which author/s conducted the interview or focus group?<br>I conducted all observation and interviews                                                                                                                                                                                                                                                                                                                                  | 6          |
| 2. Credentials What were the researcher's credentials? E.g. PhD, MD<br>DProf, RN                                                                                                                                                                                                                                                                                                                                                                                 | Title page |
| 3. Occupation What was their occupation at the time of the study?<br>Professor of Nursing and Health Research                                                                                                                                                                                                                                                                                                                                                    | Title page |
| 4. Gender Was the researcher male or female?<br>Female                                                                                                                                                                                                                                                                                                                                                                                                           | Title page |
| 5. Experience and training What experience or training did the researcher have?<br>I have extensive experience in qualitative research.                                                                                                                                                                                                                                                                                                                          | Title page |
| <i>Relationship with participants</i>                                                                                                                                                                                                                                                                                                                                                                                                                            |            |
| 6. Relationship established Was a relationship established prior to study commencement?<br>I established rapport with each observational participant at each meeting and with interviewees at the time of interview.                                                                                                                                                                                                                                             | 6          |
| 7. Participant knowledge of the interviewer<br>What did the participants know about the researcher? e.g. personal goals, reasons for doing the research<br>I met the team prior to observation, provided an information sheet, explained about myself and the study and answered questions. I gave interview participants an information sheet prior to interviews and answered any questions, I reiterated this information at the beginning of each interview. | 6          |
| 8. Interviewer characteristics What characteristics were reported about the interviewer/facilitator? e.g. Bias, assumptions, reasons and interests in the research topic<br>Participants were aware, and it is reported in the manuscript, that I am a Registered Nurse with an interest in how eczema knowledge is developed and shared between patients and practitioners in primary care and that this was a publically funded study.                         | 8          |
| <b>Domain 2: study design</b>                                                                                                                                                                                                                                                                                                                                                                                                                                    | 5          |
| <i>Theoretical framework</i>                                                                                                                                                                                                                                                                                                                                                                                                                                     |            |
| 9. Methodological orientation and theory<br>What methodological orientation was stated to underpin the study? e.g. grounded theory, discourse analysis, ethnography, phenomenology, content analysis<br>In the methods section I explain that this is an ethnographic study using observation and interviews and that data analysis followed an ethnographic approach through the lenses of mindlines and self-management.                                       |            |
| Participant selection                                                                                                                                                                                                                                                                                                                                                                                                                                            | 6          |
| 10. Sampling How were participants selected? e.g. purposive, convenience, consecutive, snowball<br>I collected observational data during 250 hours in the practice. I selected interview participants using maximum variation purposive sampling to ensure a mix of profession, gender and years in practice.                                                                                                                                                    |            |
| 11. Method of approach How were participants approached? e.g. face-to-face, telephone, mail, email<br>Observation participants were recruited at the beginning of each encounter with the practice. I recruited interview participants from the practice and local pharmacy.                                                                                                                                                                                     | 6          |
| 12. Sample size How many participants were in the study?<br>Observation involved many participants and 16 interviews were completed                                                                                                                                                                                                                                                                                                                              | 6          |
| 13. Non-participation How many people refused to participate or dropped out? Reasons?<br>On occasion I exited consultations at the request of the patient, practitioner or of my own volition<br>A few practitioners declined to take part in interviews due to time constraints.                                                                                                                                                                                | 5          |
| <i>Setting</i>                                                                                                                                                                                                                                                                                                                                                                                                                                                   |            |
| 14. Setting of data collection Where was the data collected? e.g. home, clinic, workplace<br>Observational data was collected in a GP practice. Interviews were conducted in their workplace.                                                                                                                                                                                                                                                                    | 6          |
| 15. Presence of non-participants Was anyone else present besides the participants and researchers?                                                                                                                                                                                                                                                                                                                                                               | 6          |

## BMJ Open Practitioner eczema mindlines COREQ 4.7.18

|    |                                                                                                                                                            |         |
|----|------------------------------------------------------------------------------------------------------------------------------------------------------------|---------|
| 1  | Observational data involved numerous individuals. Interviews were conducted individually.                                                                  |         |
| 2  | 16. Description of sample What are the important characteristics of the sample? e.g. demographic data, date                                                | Table 2 |
| 3  | Interview participants were sampled by profession, gender and years in practice.                                                                           |         |
| 4  | <i>Data collection</i>                                                                                                                                     | Table 1 |
| 5  | 17. Interview guide Were questions, prompts, guides provided by the authors? Was it pilot tested?                                                          |         |
| 6  | A topic guide was used for interviews                                                                                                                      |         |
| 7  | 18. Repeat interviews Were repeat interviews carried out? If yes, how many?                                                                                | NA      |
| 8  | No repeat interviews were carried out                                                                                                                      |         |
| 9  | 19. Audio/visual recording Did the research use audio or visual recording to collect the data?                                                             | 6       |
| 10 | Interviews were audio recorded and observational data recorded in field notes                                                                              |         |
| 11 | 20. Field notes Were field notes made during and/or after the interview or focus group?                                                                    | 6       |
| 12 | 21. Duration What was the duration of the interviews or focus group?                                                                                       | 6       |
| 13 | Interviews lasted from 22-40 minutes                                                                                                                       |         |
| 14 | 22. Data saturation Was data saturation discussed?                                                                                                         | 8       |
| 15 | Data sufficiency was achieved when no new sources of knowledge were identified in interviews.                                                              |         |
| 16 | 23. Transcripts returned Were transcripts returned to participants for comment and/or correction?                                                          | NA      |
| 17 | No                                                                                                                                                         |         |
| 18 | <b>Domain 3: analysis and findings</b>                                                                                                                     | 8       |
| 19 | <i>Data analysis</i>                                                                                                                                       |         |
| 20 | 24. Number of data coders How many data coders coded the data?                                                                                             |         |
| 21 | I analysed the data independently and subsequently discussed with research, clinical and lay colleagues who corroborated initial interpretations.          |         |
| 22 | 25. Description of the coding tree Did authors provide a description of the coding tree?                                                                   | NA      |
| 23 | No                                                                                                                                                         |         |
| 24 | 26. Derivation of themes Were themes identified in advance or derived from the data?                                                                       | 8       |
| 25 | Themes were derived inductively from the data                                                                                                              |         |
| 26 | 27. Software What software, if applicable, was used to manage the data?                                                                                    | NA      |
| 27 | No                                                                                                                                                         |         |
| 28 | 28. Participant checking Did participants provide feedback on the findings?                                                                                | NA      |
| 29 | No                                                                                                                                                         |         |
| 30 | <i>Reporting</i>                                                                                                                                           | 9 - 14  |
| 31 | 29. Quotations presented Were participant quotations presented to illustrate the themes / findings? Was each quotation identified? e.g. participant number |         |
| 32 | Quotations are provided and profession of participant is identified.                                                                                       |         |
| 33 | 30. Data and findings consistent Was there consistency between the data presented and the findings?                                                        | 9 - 14  |
| 34 | Yes.                                                                                                                                                       |         |
| 35 | 31. Clarity of major themes Were major themes clearly presented in the findings?                                                                           | 9 - 14  |
| 36 | Yes.                                                                                                                                                       |         |
| 37 | 32. Clarity of minor themes Is there a description of diverse cases or discussion of minor themes?                                                         | 9 - 14  |
| 38 | Yes, I present a spectrum of practitioners and variations of mindlines.                                                                                    |         |
| 39 |                                                                                                                                                            |         |
| 40 |                                                                                                                                                            |         |
| 41 |                                                                                                                                                            |         |
| 42 |                                                                                                                                                            |         |
| 43 |                                                                                                                                                            |         |
| 44 |                                                                                                                                                            |         |
| 45 |                                                                                                                                                            |         |
| 46 |                                                                                                                                                            |         |
| 47 |                                                                                                                                                            |         |
| 48 |                                                                                                                                                            |         |
| 49 |                                                                                                                                                            |         |
| 50 |                                                                                                                                                            |         |
| 51 |                                                                                                                                                            |         |
| 52 |                                                                                                                                                            |         |
| 53 |                                                                                                                                                            |         |
| 54 |                                                                                                                                                            |         |
| 55 |                                                                                                                                                            |         |
| 56 |                                                                                                                                                            |         |
| 57 |                                                                                                                                                            |         |
| 58 |                                                                                                                                                            |         |
| 59 |                                                                                                                                                            |         |
| 60 |                                                                                                                                                            |         |
